# Supplementary material for: Cooperation, decision time, and culture: Online experiments with American and Indian participants
Source: PLoS One. 2017 Feb 23;12(2):e0171252. doi: 10.1371/journal.pone.0171252 (PMC5322955; doi:10.1371/journal.pone.0171252)
Supplement: S1 File — (CSV) [file pone.0171252.s001.csv]

playerid	game	round	coop	prev_coop	prev_local_rate_coop	int_coop	int_local_rate_coop	time	ltime	country_name
40100	1	10	0	0	0.111111111	1	0.888888889	2.602	0.415307292	United States
40100	1	6	0	0	0.2	1	0.888888889	4.751	0.67678503	United States
40100	1	2	0	1	0.888888889	1	0.888888889	7.374	0.867703133	United States
40100	1	4	0	0	0.666666667	1	0.888888889	6.927	0.840545188	United States
40100	1	7	0	0	0.142857143	1	0.888888889	24.944	1.396966098	United States
40100	1	9	0	0	0	1	0.888888889	9.612	0.982813762	United States
40100	1	0	NA	NA	NA	1	0.888888889	NA	NA	United States
40100	1	5	0	0	0.333333333	1	0.888888889	3.45	0.537819095	United States
40100	1	1	1	NA	NA	1	0.888888889	4.847	0.68547302	United States
40100	1	3	0	0	0.714285714	1	0.888888889	4.562	0.659155281	United States
40100	1	8	0	0	0	1	0.888888889	10.202	1.008685319	United States
40101	1	10	0	1	0	1	0.8	1.525	0.183269844	United States
40101	1	6	0	0	0.111111111	1	0.8	2.828	0.451479405	United States
40101	1	2	1	1	0.8	1	0.8	2.462	0.391288049	United States
40101	1	5	0	1	0.666666667	1	0.8	9.727	0.987978916	United States
40101	1	3	1	1	1	1	0.8	13.214	1.121034302	United States
40101	1	7	0	0	0.090909091	1	0.8	2.72	0.434568904	United States
40101	1	8	0	0	0.083333333	1	0.8	3.629	0.559786968	United States
40101	1	4	1	1	0.714285714	1	0.8	10.883	1.036748629	United States
40101	1	9	1	0	0	1	0.8	5.306	0.724767246	United States
40101	1	0	NA	NA	NA	1	0.8	NA	NA	United States
40101	1	1	1	NA	NA	1	0.8	4.544	0.657438323	United States
40102	1	2	0	1	0.583333333	1	0.583333333	8.328	0.920540717	United States
40102	1	3	1	0	0.727272727	1	0.583333333	9.653	0.984662306	United States
40102	1	9	0	0	0	1	0.583333333	10.267	1.011443562	United States
40102	1	0	NA	NA	NA	1	0.583333333	NA	NA	United States
40102	1	10	0	0	0.1	1	0.583333333	5.283	0.722880611	United States
40102	1	8	0	0	0.111111111	1	0.583333333	7.548	0.877831891	United States
40102	1	6	0	1	0.25	1	0.583333333	8.844	0.946648734	United States
40102	1	5	1	0	0.444444444	1	0.583333333	4.917	0.691700208	United States
40102	1	4	0	1	0.555555556	1	0.583333333	10.134	1.0057809	United States
40102	1	1	1	NA	NA	1	0.583333333	8.219	0.91481898	United States
40102	1	7	0	0	0.222222222	1	0.583333333	23.421	1.369605434	United States
40103	1	5	1	0	0.75	0	0.727272727	2.786	0.444981112	India
40103	1	4	0	1	0.625	0	0.727272727	5.475	0.738384124	India
40103	1	3	1	1	0.666666667	0	0.727272727	3.573	0.553033016	India
40103	1	2	1	0	0.727272727	0	0.727272727	2.642	0.421932813	India
40103	1	7	1	0	0.25	0	0.727272727	2.462	0.391288049	India
40103	1	6	0	1	0.142857143	0	0.727272727	2.835	0.452553063	India
40103	1	10	0	0	0.285714286	0	0.727272727	1.783	0.251151343	India
40103	1	0	NA	NA	NA	0	0.727272727	NA	NA	India
40103	1	8	0	1	0.166666667	0	0.727272727	7.122	0.852601969	India
40103	1	9	0	0	0.142857143	0	0.727272727	13.328	1.124764984	India
40103	1	1	0	NA	NA	0	0.727272727	29.573	1.470895383	India
40104	1	5	0	0	0.583333333	1	0.9	15.476	1.189658721	United States
40104	1	4	0	1	0.5	1	0.9	13.581	1.132931749	United States
40104	1	2	1	1	0.9	1	0.9	8.421	0.925363667	United States
40104	1	7	0	0	0.076923077	1	0.9	5.551	0.744371227	United States
40104	1	1	1	NA	NA	1	0.9	4.407	0.644143051	United States
40104	1	6	0	0	0.25	1	0.9	3.042	0.48315921	United States
40104	1	9	0	0	0	1	0.9	5.879	0.76930346	United States
40104	1	3	1	1	0.615384615	1	0.9	4.933	0.693111115	United States
40104	1	8	0	0	0.181818182	1	0.9	1.834	0.263399331	United States
40104	1	0	NA	NA	NA	1	0.9	NA	NA	United States
40104	1	10	0	0	0.111111111	1	0.9	5.242	0.719497017	United States
40105	1	0	NA	NA	NA	1	0.8	NA	NA	United States
40105	1	7	0	1	0	1	0.8	1.922	0.283753383	United States
40105	1	9	0	0	0	1	0.8	11.318	1.05376969	United States
40105	1	2	1	1	0.8	1	0.8	6.506	0.813314059	United States
40105	1	1	1	NA	NA	1	0.8	7.978	0.901894032	United States
40105	1	5	0	1	0.285714286	1	0.8	6.541	0.815644149	United States
40105	1	3	0	1	0.555555556	1	0.8	5.115	0.708845638	United States
40105	1	8	0	0	0.25	1	0.8	11.735	1.069483094	United States
40105	1	4	1	0	0.857142857	1	0.8	4.94	0.693726949	United States
40105	1	6	1	0	0.714285714	1	0.8	8.506	0.929725378	United States
40105	1	10	0	0	0	1	0.8	2.536	0.404149249	United States
40106	1	3	1	1	0.625	1	0.6	9.757	0.989316305	United States
40106	1	2	1	1	0.6	1	0.6	32.983	1.518290155	United States
40106	1	4	0	1	0.75	1	0.6	6.503	0.813113754	United States
40106	1	5	1	0	0.285714286	1	0.6	6.621	0.820923588	United States
40106	1	8	1	1	0.2	1	0.6	12.657	1.10233078	United States
40106	1	7	1	0	0.166666667	1	0.6	22.524	1.352645519	United States
40106	1	6	0	1	0.571428571	1	0.6	6.66	0.823474229	United States
40106	1	0	NA	NA	NA	1	0.6	NA	NA	United States
40106	1	1	1	NA	NA	1	0.6	16.105	1.206960729	United States
40106	1	10	0	1	0.2	1	0.6	6.724	0.827627705	United States
40106	1	9	1	1	0	1	0.6	9.338	0.97025387	United States
40107	1	7	0	0	0	0	0.666666667	2.981	0.474361976	India
40107	1	10	0	0	0	0	0.666666667	1.696	0.229425848	India
40107	1	5	0	0	0.5	0	0.666666667	4.908	0.690904554	India
40107	1	1	0	NA	NA	0	0.666666667	12.466	1.095727123	India
40107	1	3	0	0	0.666666667	0	0.666666667	5.332	0.726890141	India
40107	1	8	0	0	0.111111111	0	0.666666667	2.968	0.472463897	India
40107	1	0	NA	NA	NA	0	0.666666667	NA	NA	India
40107	1	2	0	0	0.666666667	0	0.666666667	11.863	1.07419453	India
40107	1	4	0	0	0.571428571	0	0.666666667	2.789	0.445448514	India
40107	1	6	0	0	0	0	0.666666667	11.216	1.049838001	India
40107	1	9	0	0	0	0	0.666666667	2.113	0.324899497	India
40108	1	3	1	1	0.666666667	1	0.75	2.092	0.32056168	United States
40108	1	8	0	0	0.1	1	0.75	2.066	0.315130317	United States
40108	1	6	0	0	0.333333333	1	0.75	1.94	0.28780173	United States
40108	1	0	NA	NA	NA	1	0.75	NA	NA	United States
40108	1	9	0	0	0	1	0.75	23.355	1.368379872	United States
40108	1	5	0	1	0.384615385	1	0.75	4.448	0.648164779	United States
40108	1	1	1	NA	NA	1	0.75	4.822	0.683227206	United States
40108	1	2	1	1	0.75	1	0.75	4.931	0.692935003	United States
40108	1	10	0	0	0.083333333	1	0.75	3.295	0.517855419	United States
40108	1	7	0	0	0	1	0.75	3.021	0.480150725	United States
40108	1	4	1	1	0.727272727	1	0.75	4.492	0.652439748	United States
40110	1	6	1	0	0.555555556	1	0.9	2.005	0.302114377	United States
40110	1	0	NA	NA	NA	1	0.9	NA	NA	United States
40110	1	10	0	0	0.25	1	0.9	22.633	1.354742123	United States
40110	1	9	0	0	0.111111111	1	0.9	8.943	0.951483231	United States
40110	1	4	1	1	1	1	0.9	1.854	0.26810973	United States
40110	1	7	0	1	0	1	0.9	2.969	0.472610198	United States
40110	1	1	1	NA	NA	1	0.9	1.987	0.298197867	United States
40110	1	2	1	1	0.9	1	0.9	2.312	0.36398783	United States
40110	1	3	1	1	0.727272727	1	0.9	2.282	0.35831564	United States
40110	1	8	0	0	0.25	1	0.9	3.147	0.497896743	United States
40110	1	5	0	1	0.333333333	1	0.9	4.482	0.651471852	United States
40111	1	7	0	0	0	1	0.75	3.032	0.481729197	United States
40111	1	4	1	0	1	1	0.75	25.185	1.401141955	United States
40111	1	0	NA	NA	NA	1	0.75	NA	NA	United States
40111	1	10	0	0	0.125	1	0.75	3.274	0.515078675	United States
40111	1	1	1	NA	NA	1	0.75	5.473	0.738225448	United States
40111	1	9	0	0	0	1	0.75	5.298	0.724111954	United States
40111	1	8	0	0	0.1	1	0.75	19.188	1.28302971	United States
40111	1	2	0	1	0.75	1	0.75	6.894	0.838471279	United States
40111	1	6	0	0	0.333333333	1	0.75	16.573	1.21940113	United States
40111	1	5	0	1	0.571428571	1	0.75	14.654	1.165956187	United States
40111	1	3	0	0	0.888888889	1	0.75	5.597	0.747955307	United States
40113	1	0	NA	NA	NA	1	0.666666667	NA	NA	United States
40113	1	4	1	0	0.8	1	0.666666667	12.874	1.109713505	United States
40113	1	8	0	0	0.222222222	1	0.666666667	9.359	0.971229447	United States
40113	1	6	0	0	0.333333333	1	0.666666667	3.984	0.60031933	United States
40113	1	9	0	0	0	1	0.666666667	2.855	0.455606113	United States
40113	1	5	0	1	0.571428571	1	0.666666667	14.063	1.148077977	United States
40113	1	3	0	0	0.875	1	0.666666667	3.561	0.551571974	United States
40113	1	1	1	NA	NA	1	0.666666667	8.762	0.942603249	United States
40113	1	7	0	0	0.111111111	1	0.666666667	2.368	0.374381698	United States
40113	1	10	0	0	0.25	1	0.666666667	7.396	0.868996902	United States
40113	1	2	0	1	0.666666667	1	0.666666667	11.363	1.055493007	United States
40114	1	7	1	0	0	1	0.571428571	9.137	0.960803625	India
40114	1	10	0	0	0.2	1	0.571428571	3.833	0.583538819	India
40114	1	2	1	1	0.571428571	1	0.571428571	12.617	1.100956103	India
40114	1	9	0	0	0	1	0.571428571	30.334	1.481929682	India
40114	1	4	1	0	0.714285714	1	0.571428571	7.786	0.891314399	India
40114	1	8	0	1	0	1	0.571428571	2.929	0.466719372	India
40114	1	6	0	0	0	1	0.571428571	6.968	0.843108142	India
40114	1	5	0	1	0.666666667	1	0.571428571	7.908	0.898066661	India
40114	1	3	0	1	0.714285714	1	0.571428571	9.099	0.958993665	India
40114	1	1	1	NA	NA	1	0.571428571	10.951	1.039453779	India
40114	1	0	NA	NA	NA	1	0.571428571	NA	NA	India
40115	1	10	0	0	0.25	0	0.75	3.083	0.488973525	United States
40115	1	7	0	0	0.125	0	0.75	1.929	0.285332228	United States
40115	1	3	1	1	0.428571429	0	0.75	2.638	0.421274791	United States
40115	1	6	0	0	0.375	0	0.75	1.966	0.293583513	United States
40115	1	8	0	0	0.1	0	0.75	1.921	0.283527365	United States
40115	1	4	0	1	1	0	0.75	7.332	0.865222456	United States
40115	1	1	0	NA	NA	0	0.75	2.931	0.467015818	United States
40115	1	0	NA	NA	NA	0	0.75	NA	NA	United States
40115	1	5	0	0	0.375	0	0.75	1.957	0.291590826	United States
40115	1	9	0	0	0	0	0.75	5.256	0.720655357	United States
40115	1	2	1	0	0.75	0	0.75	4.174	0.620552445	United States
40116	1	1	0	NA	NA	0	0.7	14.822	1.170906809	India
40116	1	6	0	0	0.5	0	0.7	3.157	0.499274582	India
40116	1	8	0	0	0.166666667	0	0.7	7.187	0.856547645	India
40116	1	5	0	1	0.333333333	0	0.7	3.12	0.494154594	India
40116	1	0	NA	NA	NA	0	0.7	NA	NA	India
40116	1	7	0	0	0	0	0.7	6.89	0.838219222	India
40116	1	4	1	0	0.625	0	0.7	11.594	1.064233296	India
40116	1	3	0	1	0.363636364	0	0.7	5.044	0.702775078	India
40116	1	2	1	0	0.7	0	0.7	12.374	1.092510112	India
40116	1	10	0	0	0	0	0.7	5.951	0.77458995	India
40116	1	9	0	0	0	0	0.7	6.874	0.837209528	India
40117	1	9	0	0	0	1	0.555555556	10.692	1.02905895	United States
40117	1	1	1	NA	NA	1	0.555555556	3.025	0.480725379	United States
40117	1	3	1	1	0.727272727	1	0.555555556	2.898	0.462098381	United States
40117	1	6	0	0	0.444444444	1	0.555555556	5.46	0.737192643	United States
40117	1	7	0	0	0.285714286	1	0.555555556	3.132	0.495821753	United States
40117	1	0	NA	NA	NA	1	0.555555556	NA	NA	United States
40117	1	2	1	1	0.555555556	1	0.555555556	2.852	0.455149521	United States
40117	1	10	0	0	0.333333333	1	0.555555556	3.521	0.546666025	United States
40117	1	5	0	1	0.583333333	1	0.555555556	5.302	0.724439723	United States
40117	1	8	0	0	0.2	1	0.555555556	3.248	0.511616021	United States
40117	1	4	1	1	0.666666667	1	0.555555556	2.769	0.442322956	United States
40118	1	2	1	0	0.7	0	0.7	21.519	1.332822086	India
40118	1	0	NA	NA	NA	0	0.7	NA	NA	India
40118	1	1	0	NA	NA	0	0.7	4.629	0.665487181	India
40119	1	8	0	0	0	0	0.714285714	5.371	0.730055152	India
40119	1	9	0	0	0	0	0.714285714	10.247	1.010596736	India
40119	1	4	0	0	0.666666667	0	0.714285714	5.58	0.746634199	India
40119	1	1	0	NA	NA	0	0.714285714	8.906	0.949682691	India
40119	1	5	0	0	0.166666667	0	0.714285714	2.831	0.451939869	India
40119	1	0	NA	NA	NA	0	0.714285714	NA	NA	India
40119	1	10	0	0	0.2	0	0.714285714	5.019	0.700617196	India
40119	1	3	0	0	0.625	0	0.714285714	8.884	0.94860855	India
40119	1	6	0	0	0.2	0	0.714285714	3.531	0.547897718	India
40119	1	2	0	0	0.714285714	0	0.714285714	6.676	0.824516328	India
40119	1	7	0	0	0	0	0.714285714	3.148	0.498034724	India
40120	1	6	0	1	0.285714286	0	0.5	3.536	0.548512256	India
40120	1	5	1	0	0.5	0	0.5	5.518	0.741781696	India
40120	1	0	NA	NA	NA	0	0.5	NA	NA	India
40120	1	9	1	0	0.166666667	0	0.5	9.367	0.97160052	India
40120	1	4	0	0	0.666666667	0	0.5	8.294	0.918764031	India
40120	1	7	0	0	0.2	0	0.5	4.411	0.644537058	India
40120	1	8	0	0	0.166666667	0	0.5	2.334	0.368100852	India
40120	1	3	0	1	0.888888889	0	0.5	4.706	0.672651923	India
40120	1	1	0	NA	NA	0	0.5	3.201	0.505285674	India
40120	1	2	1	0	0.5	0	0.5	26.616	1.425142788	India
40120	1	10	1	1	0.2	0	0.5	9.113	0.95966137	India
40121	1	4	0	1	0.529411765	1	0.705882353	3.246	0.511348515	United States
40121	1	1	1	NA	NA	1	0.705882353	8.019	0.904120213	United States
40121	1	7	0	0	0.125	1	0.705882353	2.943	0.468790262	United States
40121	1	8	0	0	0.2	1	0.705882353	2.32	0.365487985	United States
40121	1	3	1	1	0.647058824	1	0.705882353	2.134	0.329194415	United States
40121	1	5	0	0	0.470588235	1	0.705882353	2.142	0.330819466	United States
40121	1	10	0	0	0.166666667	1	0.705882353	3.203	0.505556939	United States
40121	1	6	0	0	0.1875	1	0.705882353	2.51	0.399673721	United States
40121	1	0	NA	NA	NA	1	0.705882353	NA	NA	United States
40121	1	9	0	0	0.071428571	1	0.705882353	2.17	0.336459734	United States
40121	1	2	1	1	0.705882353	1	0.705882353	3.425	0.534660576	United States
40122	1	1	0	NA	NA	0	0.571428571	7.414	0.870052582	India
40122	1	2	0	0	0.571428571	0	0.571428571	4.847	0.68547302	India
40122	1	0	NA	NA	NA	0	0.571428571	NA	NA	India
40124	1	8	NA	NA	0.25	1	0.5	NA	NA	United States
40124	1	0	NA	NA	NA	1	0.5	NA	NA	United States
40124	1	7	NA	NA	0.25	1	0.5	NA	NA	United States
40124	1	6	NA	NA	0.25	1	0.5	NA	NA	United States
40124	1	9	NA	NA	0	1	0.5	NA	NA	United States
40124	1	5	NA	NA	0.5	1	0.5	NA	NA	United States
40124	1	10	NA	NA	0	1	0.5	NA	NA	United States
40124	1	3	NA	NA	1	1	0.5	NA	NA	United States
40124	1	1	1	NA	NA	1	0.5	10.267	1.011443562	United States
40124	1	4	NA	NA	0.5	1	0.5	NA	NA	United States
40124	1	2	NA	1	0.5	1	0.5	NA	NA	United States
40125	1	5	1	1	0.571428571	1	0.888888889	13.018	1.114544267	India
40125	1	4	1	1	0.571428571	1	0.888888889	8.95	0.951823035	India
40125	1	6	0	1	0.181818182	1	0.888888889	12.461	1.095552896	India
40125	1	2	1	1	0.888888889	1	0.888888889	12.038	1.080554339	India
40125	1	1	1	NA	NA	1	0.888888889	16.482	1.21700991	India
40125	1	10	1	0	0.333333333	1	0.888888889	4.112	0.614053106	India
40125	1	9	0	0	0.166666667	1	0.888888889	5.817	0.764699064	India
40125	1	3	1	1	0.75	1	0.888888889	6.003	0.778368343	India
40125	1	7	0	0	0.2	1	0.888888889	3.235	0.509874285	India
40125	1	8	0	0	0.125	1	0.888888889	3.8	0.579783597	India
40125	1	0	NA	NA	NA	1	0.888888889	NA	NA	India
40126	1	10	0	0	0.142857143	1	0.666666667	1.548	0.189770956	United States
40126	1	3	1	0	0.9	1	0.666666667	2.974	0.473340964	United States
40126	1	6	0	1	0.2	1	0.666666667	1.941	0.288025535	United States
40126	1	5	1	0	0.7	1	0.666666667	2.086	0.319314304	United States
40126	1	1	1	NA	NA	1	0.666666667	2.901	0.462547729	United States
40126	1	4	0	1	0.8	1	0.666666667	1.831	0.262688344	United States
40126	1	7	1	0	0.166666667	1	0.666666667	3.226	0.508664363	United States
40126	1	0	NA	NA	NA	1	0.666666667	NA	NA	United States
40126	1	2	0	1	0.666666667	1	0.666666667	2.599	0.41480628	United States
40126	1	9	0	0	0	1	0.666666667	2.388	0.378034322	United States
40126	1	8	0	1	0	1	0.666666667	2.141	0.330616667	United States
40200	2	10	1	1	0.888888889	1	0.8	1.502	0.176669933	United States
40200	2	0	NA	NA	NA	1	0.8	NA	NA	United States
40200	2	7	1	1	0.666666667	1	0.8	1.784	0.25139485	United States
40200	2	4	1	1	0.8	1	0.8	2.723	0.435047641	United States
40200	2	6	1	1	0.888888889	1	0.8	8.737	0.941362336	United States
40200	2	1	1	NA	NA	1	0.8	10.378	1.016113666	United States
40200	2	2	1	1	0.8	1	0.8	11.491	1.060357825	United States
40200	2	8	1	1	0.888888889	1	0.8	1.772	0.248463718	United States
40200	2	5	1	1	0.818181818	1	0.8	4.671	0.669409867	United States
40200	2	9	1	1	1	1	0.8	0.711	-0.148130399	United States
40200	2	3	1	1	0.8	1	0.8	17.018	1.230908519	United States
40201	2	1	1	NA	NA	1	0.875	5.726	0.757851344	United States
40201	2	2	1	1	0.875	1	0.875	3.853	0.585799009	United States
40201	2	10	0	1	0.6	1	0.875	3.994	0.601408061	United States
40201	2	6	0	0	0.636363636	1	0.875	3.442	0.536810866	United States
40201	2	7	0	0	0.454545455	1	0.875	4.481	0.651374944	United States
40201	2	4	1	1	0.846153846	1	0.875	2.813	0.449169732	United States
40201	2	9	1	0	0.5	1	0.875	9.297	0.968342831	United States
40201	2	8	0	0	0.5	1	0.875	5.097	0.707314634	United States
40201	2	3	1	1	0.916666667	1	0.875	2.853	0.455301772	United States
40201	2	0	NA	NA	NA	1	0.875	NA	NA	United States
40201	2	5	0	1	0.833333333	1	0.875	4.036	0.605951158	United States
40202	2	3	0	1	0.769230769	1	0.666666667	3.537	0.54863506	India
40202	2	7	0	0	0.444444444	1	0.666666667	15.086	1.178574103	India
40202	2	9	0	0	0.5	1	0.666666667	10.705	1.029586672	India
40202	2	5	0	0	0.636363636	1	0.666666667	3.47	0.540329475	India
40202	2	0	NA	NA	NA	1	0.666666667	NA	NA	India
40202	2	6	0	0	0.444444444	1	0.666666667	9.04	0.95616843	India
40202	2	2	1	1	0.666666667	1	0.666666667	19.205	1.283414312	India
40202	2	1	1	NA	NA	1	0.666666667	8.044	0.905472062	India
40202	2	8	0	0	0.444444444	1	0.666666667	2.331	0.367542274	India
40202	2	4	0	0	0.769230769	1	0.666666667	2.96	0.471291711	India
40202	2	10	0	0	0.75	1	0.666666667	2.251	0.352375495	India
40203	2	10	0	0	0.857142857	1	0.636363636	4.597	0.662474504	United States
40203	2	4	0	0	0.666666667	1	0.636363636	5.593	0.747644819	United States
40203	2	0	NA	NA	NA	1	0.636363636	NA	NA	United States
40203	2	2	0	1	0.636363636	1	0.636363636	2.38	0.376576957	United States
40203	2	3	0	0	0.8	1	0.636363636	2.548	0.406199424	United States
40203	2	5	0	0	0.666666667	1	0.636363636	2.518	0.401055726	United States
40203	2	1	1	NA	NA	1	0.636363636	8.942	0.951434666	United States
40203	2	9	0	0	0.571428571	1	0.636363636	5.13	0.710117365	United States
40203	2	6	0	0	0.375	1	0.636363636	1.683	0.226084116	United States
40203	2	8	0	0	0.333333333	1	0.636363636	3.063	0.486146997	United States
40203	2	7	0	0	0.428571429	1	0.636363636	2.876	0.458788882	United States
40204	2	10	0	1	0.666666667	0	0.9	3.522	0.546789352	United States
40204	2	7	0	0	0.333333333	0	0.9	2.689	0.429590802	United States
40204	2	4	0	0	0.6	0	0.9	19.228	1.283934113	United States
40204	2	5	0	0	0.6	0	0.9	1.951	0.290257269	United States
40204	2	1	0	NA	NA	0	0.9	5.074	0.705350463	United States
40204	2	9	1	0	0.25	0	0.9	4.21	0.624282096	United States
40204	2	2	0	0	0.9	0	0.9	29.895	1.475598558	United States
40204	2	3	0	0	0.833333333	0	0.9	9.798	0.991137435	United States
40204	2	0	NA	NA	NA	0	0.9	NA	NA	United States
40204	2	6	0	0	0.4	0	0.9	4.703	0.672374979	United States
40204	2	8	0	0	0.333333333	0	0.9	3.238	0.510276844	United States
40205	2	6	1	1	0.8	1	0.7	3.884	0.589279221	United States
40205	2	7	1	1	0.636363636	1	0.7	2.477	0.393926007	United States
40205	2	10	1	1	0.8	1	0.7	2.322	0.365862215	United States
40205	2	9	1	1	0.9	1	0.7	3.04	0.482873584	United States
40205	2	4	1	1	1	1	0.7	2.78	0.444044796	United States
40205	2	1	1	NA	NA	1	0.7	4.259	0.62930764	United States
40205	2	8	1	1	0.8	1	0.7	2.212	0.344785123	United States
40205	2	5	1	1	1	1	0.7	3.671	0.564784385	United States
40205	2	0	NA	NA	NA	1	0.7	NA	NA	United States
40205	2	2	1	1	0.7	1	0.7	5.264	0.721315881	United States
40205	2	3	1	1	1	1	0.7	3.317	0.520745472	United States
40207	2	5	0	1	0.666666667	0	0.714285714	2.016	0.304490528	United States
40207	2	9	1	1	0.5	0	0.714285714	4.586	0.66143405	United States
40207	2	2	1	0	0.714285714	0	0.714285714	1.967	0.29380436	United States
40207	2	8	1	0	0.454545455	0	0.714285714	7.348	0.866169148	United States
40207	2	0	NA	NA	NA	0	0.714285714	NA	NA	United States
40207	2	10	0	1	0.615384615	0	0.714285714	4.56	0.658964843	United States
40207	2	3	1	1	0.888888889	0	0.714285714	4.57	0.6599162	United States
40207	2	4	1	1	0.818181818	0	0.714285714	22.081	1.344018738	United States
40207	2	6	0	0	0.545454545	0	0.714285714	3.858	0.586362223	United States
40207	2	7	0	0	0.416666667	0	0.714285714	2.534	0.403806611	United States
40207	2	1	0	NA	NA	0	0.714285714	2.648	0.422917981	United States
40208	2	0	NA	NA	NA	1	0.75	NA	NA	United States
40208	2	9	1	1	0.888888889	1	0.75	1.834	0.263399331	United States
40208	2	2	1	1	0.75	1	0.75	3.161	0.499824496	United States
40208	2	8	1	1	0.75	1	0.75	2.803	0.447623098	United States
40208	2	6	0	1	0.6	1	0.75	6.342	0.802226238	United States
40208	2	5	1	1	0.8	1	0.75	2.618	0.417969642	United States
40208	2	1	1	NA	NA	1	0.75	4.066	0.609167374	United States
40208	2	10	1	1	0.818181818	1	0.75	3.941	0.595606435	United States
40208	2	4	1	1	0.8	1	0.75	2.55	0.40654018	United States
40208	2	7	1	0	0.571428571	1	0.75	2.514	0.400365273	United States
40208	2	3	1	1	0.75	1	0.75	2.854	0.455453969	United States
40209	2	9	1	1	0.75	1	0.714285714	12.127	1.083753378	United States
40209	2	7	1	1	0.583333333	1	0.714285714	2.41	0.382017043	United States
40209	2	3	1	1	0.7	1	0.714285714	3.942	0.59571662	United States
40209	2	1	1	NA	NA	1	0.714285714	7.229	0.859078225	United States
40209	2	0	NA	NA	NA	1	0.714285714	NA	NA	United States
40209	2	2	1	1	0.714285714	1	0.714285714	3.464	0.539577883	United States
40209	2	6	1	1	0.7	1	0.714285714	10.559	1.02362279	United States
40209	2	4	1	1	0.727272727	1	0.714285714	2.017	0.304705898	United States
40209	2	8	1	1	0.666666667	1	0.714285714	2.984	0.474798819	United States
40209	2	5	1	1	0.818181818	1	0.714285714	2.941	0.468495025	United States
40209	2	10	1	1	0.75	1	0.714285714	4.982	0.697403723	United States
40210	2	1	1	NA	NA	NA	NA	8.092	0.908055874	India
40210	2	0	NA	NA	NA	NA	NA	NA	NA	India
40211	2	0	NA	NA	NA	NA	NA	NA	NA	India
40211	2	1	0	NA	NA	NA	NA	11.334	1.054383208	India
40213	2	5	1	1	0.75	1	0.875	2.461	0.391111614	India
40213	2	2	1	1	0.875	1	0.875	6.865	0.836640542	India
40213	2	9	1	1	0.636363636	1	0.875	2.444	0.388101202	India
40213	2	1	1	NA	NA	1	0.875	4.506	0.653791187	India
40213	2	3	1	1	0.909090909	1	0.875	8.709	0.939968291	India
40213	2	10	1	1	0.7	1	0.875	4.629	0.665487181	India
40213	2	6	1	1	0.875	1	0.875	2.395	0.379305518	India
40213	2	0	NA	NA	NA	1	0.875	NA	NA	India
40213	2	4	1	1	0.833333333	1	0.875	2.69	0.42975228	India
40213	2	8	1	1	0.7	1	0.875	3.3	0.51851394	India
40213	2	7	1	1	0.875	1	0.875	2.95	0.469822016	India
40214	2	1	1	NA	NA	1	0.818181818	5.795	0.76305344	Mexico
40214	2	9	1	1	1	1	0.818181818	21.145	1.325207689	Mexico
40214	2	3	1	1	0.8	1	0.818181818	7.877	0.896360845	Mexico
40214	2	10	0	1	0.9	1	0.818181818	13.453	1.128819142	Mexico
40214	2	6	1	1	0.727272727	1	0.818181818	2.456	0.390228362	Mexico
40214	2	2	1	1	0.818181818	1	0.818181818	6.763	0.830139387	Mexico
40214	2	8	1	1	0.8	1	0.818181818	19.919	1.299267532	Mexico
40214	2	5	1	1	0.727272727	1	0.818181818	2.101	0.322426052	Mexico
40214	2	0	NA	NA	NA	1	0.818181818	NA	NA	Mexico
40214	2	7	1	1	0.7	1	0.818181818	9.971	0.998738716	Mexico
40214	2	4	1	1	0.727272727	1	0.818181818	12.94	1.111934276	Mexico
40215	2	3	1	1	1	1	0.75	2.265	0.355068206	United States
40215	2	2	1	1	0.75	1	0.75	2.732	0.436480695	United States
40215	2	6	0	1	0.636363636	1	0.75	3.061	0.48586333	United States
40215	2	1	1	NA	NA	1	0.75	2.676	0.427486109	United States
40215	2	7	1	0	0.545454545	1	0.75	3.521	0.546666025	United States
40215	2	8	1	1	0.666666667	1	0.75	3.645	0.561697533	United States
40215	2	5	1	1	0.8	1	0.75	1.782	0.2509077	United States
40215	2	0	NA	NA	NA	1	0.75	NA	NA	United States
40215	2	9	0	1	0.818181818	1	0.75	3.953	0.596926814	United States
40215	2	10	0	0	0.909090909	1	0.75	12.842	1.108632666	United States
40215	2	4	1	1	0.9	1	0.75	7.242	0.85985852	United States
40216	2	8	0	0	0.25	0	0.8	13.801	1.139910556	India
40216	2	5	0	0	0.8	0	0.8	3.215	0.507180977	India
40216	2	6	0	0	0.25	0	0.8	6.564	0.817168572	India
40216	2	7	0	0	0	0	0.8	8.245	0.91619066	India
40216	2	9	0	0	0.5	0	0.8	3.25	0.511883361	India
40216	2	2	1	0	0.8	0	0.8	10.558	1.023581658	India
40216	2	10	1	0	0.5	0	0.8	6.526	0.814647069	India
40216	2	4	0	1	0.833333333	0	0.8	4.02	0.604226053	India
40216	2	1	0	NA	NA	0	0.8	6.757	0.829753919	India
40216	2	3	1	1	0.857142857	0	0.8	12.068	1.081635302	India
40216	2	0	NA	NA	NA	0	0.8	NA	NA	India
40217	2	3	1	1	0.909090909	1	0.9	17.448	1.241745653	Mexico
40217	2	7	1	1	0.583333333	1	0.9	6.389	0.805432888	Mexico
40217	2	9	1	1	0.75	1	0.9	23.608	1.373059196	Mexico
40217	2	5	1	1	0.818181818	1	0.9	2.978	0.473924693	Mexico
40217	2	4	1	1	0.833333333	1	0.9	9.008	0.954628378	Mexico
40217	2	1	1	NA	NA	1	0.9	25.879	1.412947491	Mexico
40217	2	0	NA	NA	NA	1	0.9	NA	NA	Mexico
40217	2	2	1	1	0.9	1	0.9	4.916	0.691611874	Mexico
40217	2	10	1	1	0.692307692	1	0.9	4.876	0.688063697	Mexico
40217	2	8	1	1	0.615384615	1	0.9	5.459	0.737113094	Mexico
40217	2	6	1	1	0.636363636	1	0.9	4.649	0.667359546	Mexico
40218	2	4	1	1	0.888888889	1	0.888888889	3.198	0.504878459	United States
40218	2	1	1	NA	NA	1	0.888888889	4.288	0.632254777	United States
40218	2	6	1	1	0.666666667	1	0.888888889	2.714	0.433609843	United States
40218	2	7	1	1	0.6	1	0.888888889	2.631	0.420120848	United States
40218	2	2	1	1	0.888888889	1	0.888888889	3.795	0.57921178	United States
40218	2	3	1	1	1	1	0.888888889	11.378	1.056065929	United States
40218	2	5	1	1	0.888888889	1	0.888888889	3.669	0.564547712	United States
40218	2	8	1	1	0.777777778	1	0.888888889	3.248	0.511616021	United States
40218	2	0	NA	NA	NA	1	0.888888889	NA	NA	United States
40218	2	10	1	1	0.818181818	1	0.888888889	2.703	0.431846046	United States
40218	2	9	1	1	0.9	1	0.888888889	2.577	0.411114419	United States
40219	2	3	1	1	1	1	1	6.198	0.792251572	United States
40219	2	1	1	NA	NA	1	1	7.197	0.857151503	United States
40219	2	2	1	1	1	1	1	13.142	1.118661463	United States
40219	2	0	NA	NA	NA	1	1	NA	NA	United States
40220	2	8	0	0	0.666666667	0	1	4.823	0.683317262	Belgium
40220	2	9	0	0	0.75	0	1	2.87	0.457881897	Belgium
40220	2	6	1	0	0.4	0	1	3.599	0.556181847	Belgium
40220	2	0	NA	NA	NA	0	1	NA	NA	Belgium
40220	2	7	0	1	0.555555556	0	1	4.169	0.620031895	Belgium
40220	2	2	0	0	1	0	1	6.291	0.798719685	Belgium
40220	2	10	0	0	0.75	0	1	3.213	0.506910726	Belgium
40220	2	5	0	0	0.6	0	1	11.56	1.062957834	Belgium
40220	2	1	0	NA	NA	0	1	2.577	0.411114419	Belgium
40220	2	4	0	0	0.6	0	1	6.406	0.806586934	Belgium
40220	2	3	0	0	0.8	0	1	3.031	0.481585936	Belgium
40300	3	8	0	0	0.363636364	0	0.333333333	3.12	0.494154594	United States
40300	3	3	1	1	0.8	0	0.333333333	8.134	0.910304168	United States
40300	3	6	0	1	0.25	0	0.333333333	19.422	1.28829395	United States
40300	3	10	0	0	0.25	0	0.333333333	5.767	0.760949951	United States
40300	3	2	1	0	0.333333333	0	0.333333333	5.876	0.769081787	United States
40300	3	7	0	0	0.363636364	0	0.333333333	10.623	1.026247181	United States
40300	3	1	0	NA	NA	0	0.333333333	13.972	1.145258577	United States
40300	3	4	0	1	0.5	0	0.333333333	2.129	0.328175661	United States
40300	3	0	NA	NA	NA	0	0.333333333	NA	NA	United States
40300	3	9	0	0	0.454545455	0	0.333333333	7.622	0.882068944	United States
40300	3	5	1	0	0.666666667	0	0.333333333	9.679	0.98583049	United States
40301	3	7	0	0	0.5	0	0.875	15.495	1.190191581	India
40301	3	2	0	0	0.875	0	0.875	3.947	0.596267126	India
40301	3	10	1	1	0.75	0	0.875	2.477	0.393926007	India
40301	3	0	NA	NA	NA	0	0.875	NA	NA	India
40301	3	3	0	0	0.9	0	0.875	2.921	0.465531557	India
40301	3	8	1	0	0.75	0	0.875	5.61	0.748962861	India
40301	3	5	0	0	0.666666667	0	0.875	1.929	0.285332228	India
40301	3	9	1	1	0.75	0	0.875	3.626	0.5594278	India
40301	3	1	0	NA	NA	0	0.875	8.088	0.907841143	India
40301	3	4	0	0	0.7	0	0.875	2.437	0.386855529	India
40301	3	6	0	0	0.666666667	0	0.875	2.01	0.303196057	India
40302	3	2	1	1	0.6	1	0.6	5.537	0.743274524	United States
40302	3	5	0	1	0.4375	1	0.6	9.197	0.963646186	United States
40302	3	1	1	NA	NA	1	0.6	9.137	0.960803625	United States
40302	3	0	NA	NA	NA	1	0.6	NA	NA	United States
40302	3	4	1	1	0.4375	1	0.6	18.433	1.265596023	United States
40302	3	3	1	1	0.571428571	1	0.6	20.607	1.314014771	United States
40303	3	3	0	0	0.555555556	0	0.625	3.238	0.510276844	United States
40303	3	4	0	0	0.375	0	0.625	4.092	0.611935625	United States
40303	3	2	0	0	0.625	0	0.625	3.866	0.58726185	United States
40303	3	5	0	0	0.5	0	0.625	2.601	0.415140352	United States
40303	3	7	0	0	0.428571429	0	0.625	2.336	0.368472838	United States
40303	3	0	NA	NA	NA	0	0.625	NA	NA	United States
40303	3	1	0	NA	NA	0	0.625	2.906	0.46329561	United States
40303	3	9	0	0	0.333333333	0	0.625	2.615	0.417471693	United States
40303	3	10	0	0	0.142857143	0	0.625	2.167	0.335858911	United States
40303	3	8	0	0	0.375	0	0.625	3.089	0.489817908	United States
40303	3	6	0	0	0.375	0	0.625	2.74	0.437750563	United States
40304	3	6	0	1	0.3125	1	0.636363636	5.3	0.72427587	India
40304	3	4	1	1	0.5	1	0.636363636	4.71	0.673020907	India
40304	3	2	1	1	0.636363636	1	0.636363636	6.293	0.798857732	India
40304	3	8	1	1	0.307692308	1	0.636363636	4.246	0.62797999	India
40304	3	5	1	1	0.5625	1	0.636363636	9.509	0.978134847	India
40304	3	3	1	1	0.5625	1	0.636363636	26.176	1.417903282	India
40304	3	0	NA	NA	NA	1	0.636363636	NA	NA	India
40304	3	9	1	1	0.538461538	1	0.636363636	2.901	0.462547729	India
40304	3	7	1	0	0.428571429	1	0.636363636	3.865	0.587149498	India
40304	3	10	0	1	0.266666667	1	0.636363636	3.595	0.555698895	India
40304	3	1	1	NA	NA	1	0.636363636	9.486	0.97708312	India
40305	3	3	0	0	0.666666667	0	0.444444444	3.898	0.590841835	United States
40305	3	2	0	0	0.444444444	0	0.444444444	6.02	0.779596491	United States
40305	3	1	0	NA	NA	0	0.444444444	6.501	0.812980166	United States
40305	3	0	NA	NA	NA	0	0.444444444	NA	NA	United States
40306	3	2	1	0	0.333333333	0	0.333333333	9.95	0.997823081	India
40306	3	8	1	0	0.666666667	0	0.333333333	5.028	0.701395269	India
40306	3	4	1	0	0.571428571	0	0.333333333	17.877	1.25229464	India
40306	3	0	NA	NA	NA	0	0.333333333	NA	NA	India
40306	3	7	0	0	0.5	0	0.333333333	6.534	0.81517913	India
40306	3	5	0	1	0.375	0	0.333333333	6.596	0.819280647	India
40306	3	3	0	1	0.625	0	0.333333333	8.751	0.942057684	India
40306	3	6	0	0	0.375	0	0.333333333	4.096	0.612359948	India
40306	3	9	0	1	0.2	0	0.333333333	26.864	1.429170679	India
40306	3	10	0	0	0.25	0	0.333333333	4.621	0.664735969	India
40306	3	1	0	NA	NA	0	0.333333333	11.68	1.067442843	India
40307	3	2	0	0	0.666666667	0	0.666666667	3.494	0.543322901	India
40307	3	1	0	NA	NA	0	0.666666667	3.89	0.589949601	India
40307	3	0	NA	NA	NA	0	0.666666667	NA	NA	India
40307	3	5	0	0	0.375	0	0.666666667	2.749	0.43917474	India
40307	3	4	0	0	0.285714286	0	0.666666667	11.674	1.067219689	India
40307	3	3	0	0	0.2	0	0.666666667	2.89	0.460897843	India
40307	3	6	0	0	0.25	0	0.666666667	3.001	0.477265995	India
40307	3	7	0	0	0.2	0	0.666666667	3.283	0.516270883	India
40307	3	8	0	0	0.333333333	0	0.666666667	2.38	0.376576957	India
40307	3	9	0	0	0.272727273	0	0.666666667	2.452	0.389520466	India
40307	3	10	0	0	0.222222222	0	0.666666667	5.635	0.75089392	India
40308	3	3	1	1	0.75	1	0.888888889	3.168	0.500785173	United States
40308	3	4	1	1	0.533333333	1	0.888888889	2.456	0.390228362	United States
40308	3	5	1	1	0.5	1	0.888888889	2.449	0.388988785	United States
40308	3	9	1	1	0.428571429	1	0.888888889	3.092	0.490239485	United States
40308	3	8	1	1	0.375	1	0.888888889	2.329	0.367169489	United States
40308	3	7	1	1	0.4	1	0.888888889	2.255	0.353146546	United States
40308	3	0	NA	NA	NA	1	0.888888889	NA	NA	United States
40308	3	1	1	NA	NA	1	0.888888889	2.561	0.408409578	United States
40308	3	6	1	1	0.3125	1	0.888888889	3.326	0.521922245	United States
40308	3	2	1	1	0.888888889	1	0.888888889	2.537	0.404320467	United States
40308	3	10	1	1	0.25	1	0.888888889	2.151	0.33264041	United States
40309	3	2	0	1	0.5	1	0.5	7.411	0.869876813	United States
40309	3	8	0	0	0.285714286	1	0.5	12.27	1.088844563	United States
40309	3	9	0	0	0.428571429	1	0.5	14.181	1.151706857	United States
40309	3	0	NA	NA	NA	1	0.5	NA	NA	United States
40309	3	5	0	0	0.555555556	1	0.5	5.029	0.701481636	United States
40309	3	1	1	NA	NA	1	0.5	10.659	1.027716462	United States
40309	3	4	0	0	0.545454545	1	0.5	7.509	0.875582104	United States
40309	3	6	0	0	0.222222222	1	0.5	11.401	1.056942946	United States
40309	3	10	0	0	0.5	1	0.5	3.499	0.543943942	United States
40309	3	7	0	0	0.285714286	1	0.5	11.207	1.049489372	United States
40309	3	3	0	0	0.7	1	0.5	4.918	0.691788524	United States
40310	3	10	0	0	0.285714286	0	0.636363636	7.751	0.889357737	United States
40310	3	8	0	0	0.333333333	0	0.636363636	3.675	0.565257343	United States
40310	3	4	0	0	0.583333333	0	0.636363636	3.092	0.490239485	United States
40310	3	6	0	0	0.3	0	0.636363636	32.241	1.508408504	United States
40310	3	9	0	0	0.142857143	0	0.636363636	2.729	0.436003536	United States
40310	3	5	0	0	0.4	0	0.636363636	2.69	0.42975228	United States
40310	3	2	0	0	0.636363636	0	0.636363636	4.9	0.69019608	United States
40310	3	1	0	NA	NA	0	0.636363636	4.142	0.617210095	United States
40310	3	7	0	0	0.222222222	0	0.636363636	3.099	0.491221576	United States
40310	3	3	0	0	0.545454545	0	0.636363636	3.148	0.498034724	United States
40310	3	0	NA	NA	NA	0	0.636363636	NA	NA	United States
40311	3	5	0	0	0.6	0	0	3.531	0.547897718	India
40311	3	1	0	NA	NA	0	0	3.451	0.537944959	India
40311	3	8	0	0	0.5	0	0	2.941	0.468495025	India
40311	3	3	1	0	0.666666667	0	0	3.039	0.4827307	India
40311	3	10	0	0	0.25	0	0	1.96	0.292256071	India
40311	3	9	0	0	0.5	0	0	3.318	0.520876382	India
40311	3	0	NA	NA	NA	0	0	NA	NA	India
40311	3	2	0	0	0	0	0	3.218	0.50758604	India
40311	3	6	0	0	0.2	0	0	3.584	0.554368001	India
40311	3	7	0	0	0.5	0	0	2.191	0.340642378	India
40311	3	4	0	1	0.5	0	0	2.042	0.310055738	India
40313	3	1	1	NA	NA	1	0.857142857	3.033	0.48187241	United States
40313	3	2	1	1	0.857142857	1	0.857142857	2.958	0.47099817	United States
40313	3	4	1	0	0.818181818	1	0.857142857	2.643	0.422097163	United States
40313	3	5	0	1	0.8	1	0.857142857	2.431	0.385784959	United States
40313	3	3	0	1	0.8	1	0.857142857	2.329	0.367169489	United States
40313	3	7	1	1	0.5	1	0.857142857	2.309	0.363423933	United States
40313	3	6	1	0	0.4	1	0.857142857	2.126	0.32756326	United States
40313	3	0	NA	NA	NA	1	0.857142857	NA	NA	United States
40314	3	1	1	NA	NA	1	0.636363636	6.425	0.807873132	United States
40314	3	3	0	1	0.571428571	1	0.636363636	3.957	0.59736605	United States
40314	3	0	NA	NA	NA	1	0.636363636	NA	NA	United States
40314	3	2	1	1	0.636363636	1	0.636363636	5.187	0.714916248	United States
40315	3	10	1	1	0.444444444	1	0.777777778	11.297	1.052963129	United States
40315	3	6	1	1	0.75	1	0.777777778	3.058	0.485437481	United States
40315	3	3	1	1	0.727272727	1	0.777777778	3.011	0.478710756	United States
40315	3	2	1	1	0.777777778	1	0.777777778	3.385	0.529558673	United States
40315	3	7	1	1	0.6	1	0.777777778	4.578	0.660675788	United States
40315	3	0	NA	NA	NA	1	0.777777778	NA	NA	United States
40315	3	8	1	1	0.6	1	0.777777778	5.343	0.727785174	United States
40315	3	4	1	1	0.75	1	0.777777778	2.858	0.456062224	United States
40315	3	5	1	1	0.6	1	0.777777778	5.549	0.744214725	United States
40315	3	9	1	1	0.666666667	1	0.777777778	6.455	0.809896247	United States
40315	3	1	1	NA	NA	1	0.777777778	6.924	0.840357059	United States
40316	3	3	0	1	0.5	0	0.857142857	20.774	1.317520127	United States
40316	3	5	NA	NA	0	0	0.857142857	NA	NA	United States
40316	3	6	NA	NA	0	0	0.857142857	NA	NA	United States
40316	3	0	NA	NA	NA	0	0.857142857	NA	NA	United States
40316	3	10	NA	NA	0	0	0.857142857	NA	NA	United States
40316	3	4	NA	0	0	0	0.857142857	NA	NA	United States
40316	3	8	NA	NA	0	0	0.857142857	NA	NA	United States
40316	3	1	0	NA	NA	0	0.857142857	6.104	0.785614525	United States
40316	3	7	NA	NA	0	0	0.857142857	NA	NA	United States
40316	3	2	1	0	0.857142857	0	0.857142857	7.873	0.896140251	United States
40316	3	9	NA	NA	0	0	0.857142857	NA	NA	United States
40317	3	3	0	1	0.6	0	0.571428571	2.581	0.411788005	United States
40317	3	6	0	0	0.375	0	0.571428571	2.647	0.422753941	United States
40317	3	7	0	0	0.142857143	0	0.571428571	1.934	0.28645647	United States
40317	3	2	1	0	0.571428571	0	0.571428571	4.079	0.610553705	United States
40317	3	4	0	0	0.7	0	0.571428571	2.899	0.462248215	United States
40317	3	8	0	0	0.285714286	0	0.571428571	4.2	0.62324929	United States
40317	3	10	0	0	0.25	0	0.571428571	1.995	0.2999429	United States
40317	3	9	0	0	0.285714286	0	0.571428571	2.897	0.461948495	United States
40317	3	5	0	0	0.5	0	0.571428571	3.344	0.524266269	United States
40317	3	0	NA	NA	NA	0	0.571428571	NA	NA	United States
40317	3	1	0	NA	NA	0	0.571428571	2.863	0.456821348	United States
40318	3	5	0	0	0.461538462	1	0.875	7.021	0.846398973	United States
40318	3	4	0	1	0.5	1	0.875	9.911	0.996117476	United States
40318	3	7	0	0	0.454545455	1	0.875	5.434	0.735119634	United States
40318	3	6	0	0	0.384615385	1	0.875	3.676	0.565375503	United States
40318	3	3	1	1	0.571428571	1	0.875	18.317	1.262854345	United States
40318	3	0	NA	NA	NA	1	0.875	NA	NA	United States
40318	3	2	1	1	0.875	1	0.875	8.243	0.9160853	United States
40318	3	1	1	NA	NA	1	0.875	5.419	0.733919151	United States
40318	3	8	0	0	0.363636364	1	0.875	6.193	0.79190108	United States
40318	3	9	0	0	0.333333333	1	0.875	4.435	0.646893624	United States
40318	3	10	0	0	0.2	1	0.875	3.313	0.520221436	United States
40319	3	7	0	0	0.444444444	1	0.666666667	7.606	0.881156321	United States
40319	3	8	1	0	0.5	1	0.666666667	9.789	0.990738329	United States
40319	3	0	NA	NA	NA	1	0.666666667	NA	NA	United States
40319	3	6	0	1	0.428571429	1	0.666666667	11.752	1.070111783	United States
40319	3	5	1	0	0.833333333	1	0.666666667	4.858	0.68645751	United States
40319	3	3	1	0	0.833333333	1	0.666666667	2.823	0.450710878	United States
40319	3	4	0	1	0.636363636	1	0.666666667	4.05	0.607455023	United States
40319	3	10	0	0	0.428571429	1	0.666666667	2.071	0.316180099	United States
40319	3	1	1	NA	NA	1	0.666666667	3.309	0.519696767	United States
40319	3	2	0	1	0.666666667	1	0.666666667	16.064	1.205853695	United States
40319	3	9	0	1	0.375	1	0.666666667	3.673	0.565020928	United States
40320	3	2	1	1	0.777777778	1	0.777777778	14.35	1.156851901	United States
40320	3	9	NA	NA	0	1	0.777777778	NA	NA	United States
40320	3	3	1	1	0.6	1	0.777777778	22.191	1.346176873	United States
40320	3	6	NA	NA	0.5	1	0.777777778	NA	NA	United States
40320	3	8	NA	NA	0	1	0.777777778	NA	NA	United States
40320	3	5	NA	1	0	1	0.777777778	NA	NA	United States
40320	3	10	NA	NA	0	1	0.777777778	NA	NA	United States
40320	3	7	NA	NA	0	1	0.777777778	NA	NA	United States
40320	3	4	1	1	0.636363636	1	0.777777778	2.924	0.465977368	United States
40320	3	0	NA	NA	NA	1	0.777777778	NA	NA	United States
40320	3	1	1	NA	NA	1	0.777777778	3.918	0.593064432	United States
40321	3	6	1	1	0.428571429	1	0.857142857	2.724	0.435207103	India
40321	3	5	1	0	0.714285714	1	0.857142857	3.493	0.543198586	India
40321	3	3	1	1	0.875	1	0.857142857	19.954	1.300029968	India
40321	3	0	NA	NA	NA	1	0.857142857	NA	NA	India
40321	3	7	1	1	0.625	1	0.857142857	7.544	0.87760168	India
40321	3	4	0	1	0.75	1	0.857142857	6.139	0.788097633	India
40321	3	1	1	NA	NA	1	0.857142857	13.661	1.135482491	India
40321	3	2	1	1	0.857142857	1	0.857142857	7.995	0.902818468	India
40321	3	9	0	0	0.833333333	1	0.857142857	4.964	0.695831773	India
40321	3	10	0	0	0.6	1	0.857142857	4.236	0.626955951	India
40321	3	8	0	1	0.5	1	0.857142857	10.272	1.011655011	India
40322	3	3	0	1	0.818181818	1	0.75	16.395	1.214711421	United States
40322	3	5	0	1	0.727272727	1	0.75	18.567	1.268741737	United States
40322	3	10	0	0	0.5	1	0.75	4.43	0.646403726	United States
40322	3	6	1	0	0.555555556	1	0.75	12.369	1.09233459	United States
40322	3	9	0	1	0.444444444	1	0.75	1.709	0.232742063	United States
40322	3	0	NA	NA	NA	1	0.75	NA	NA	United States
40322	3	4	1	0	0.8	1	0.75	3.186	0.503245771	United States
40322	3	1	1	NA	NA	1	0.75	19.915	1.299180311	United States
40322	3	8	1	0	0.666666667	1	0.75	1.752	0.243534102	United States
40322	3	7	0	1	0.5	1	0.75	6.419	0.807467376	United States
40322	3	2	1	1	0.75	1	0.75	3.353	0.525433553	United States
40323	3	10	1	1	0.6	1	0.666666667	4.093	0.612041745	United States
40323	3	1	1	NA	NA	1	0.666666667	9.829	0.992509335	United States
40323	3	8	1	1	0.714285714	1	0.666666667	3.46	0.539076099	United States
40323	3	9	1	1	0.666666667	1	0.666666667	3.72	0.57054294	United States
40323	3	6	1	1	0.714285714	1	0.666666667	7.276	0.86189269	United States
40323	3	5	1	1	0.857142857	1	0.666666667	3.867	0.587374172	United States
40323	3	3	1	0	0.857142857	1	0.666666667	5.15	0.711807229	United States
40323	3	7	1	1	0.714285714	1	0.666666667	11.619	1.065168752	United States
40323	3	2	0	1	0.666666667	1	0.666666667	21.203	1.326397313	United States
40323	3	4	1	1	0.75	1	0.666666667	10.948	1.039334789	United States
40323	3	0	NA	NA	NA	1	0.666666667	NA	NA	United States
40324	3	2	1	1	0.5	1	0.5	4.468	0.650113164	United States
40324	3	0	NA	NA	NA	1	0.5	NA	NA	United States
40324	3	4	1	1	0.5	1	0.5	2.307	0.363047595	United States
40324	3	3	1	1	0.615384615	1	0.5	2.43	0.385606274	United States
40324	3	1	1	NA	NA	1	0.5	2.963	0.471731651	United States
40325	3	5	0	1	0.5	1	0.75	6.264	0.796851749	United States
40325	3	1	1	NA	NA	1	0.75	5.824	0.765221366	United States
40325	3	6	1	0	0.357142857	1	0.75	15.75	1.197280558	United States
40325	3	4	1	1	0.727272727	1	0.75	16.216	1.209943736	United States
40325	3	2	0	1	0.75	1	0.75	9.801	0.991270389	United States
40325	3	7	1	1	0.4	1	0.75	3.871	0.587823171	United States
40325	3	8	0	1	0.375	1	0.75	1.825	0.261262869	United States
40325	3	0	NA	NA	NA	1	0.75	NA	NA	United States
40325	3	3	1	0	0.714285714	1	0.75	13.652	1.13519628	United States
40325	3	9	0	0	0.5	1	0.75	14.338	1.156488576	United States
40325	3	10	1	0	0.333333333	1	0.75	2.124	0.327154512	United States
40401	4	7	0	0	0.428571429	0	0.5	15.036	1.177132317	Macedonia
40401	4	9	0	0	0.166666667	0	0.5	5.335	0.727134424	Macedonia
40401	4	0	NA	NA	NA	0	0.5	NA	NA	Macedonia
40401	4	3	0	1	0.428571429	0	0.5	12.203	1.086466611	Macedonia
40401	4	8	0	0	0.4	0	0.5	2.326	0.36660971	Macedonia
40401	4	2	1	0	0.5	0	0.5	5.662	0.752969865	Macedonia
40401	4	1	0	NA	NA	0	0.5	3.571	0.55278985	Macedonia
40401	4	4	0	0	0.714285714	0	0.5	2.442	0.38774566	Macedonia
40401	4	6	0	0	0.571428571	0	0.5	9.932	0.997036711	Macedonia
40401	4	5	0	0	0.571428571	0	0.5	5.886	0.769820258	Macedonia
40401	4	10	0	0	0.166666667	0	0.5	2.686	0.429106008	Macedonia
40403	4	7	1	1	0.727272727	1	0.9	1.455	0.162862993	United States
40403	4	4	1	1	1	1	0.9	9.38	0.972202838	United States
40403	4	6	1	1	0.777777778	1	0.9	9.006	0.954531943	United States
40403	4	9	1	1	0.727272727	1	0.9	5.577	0.746400644	United States
40403	4	8	1	1	0.818181818	1	0.9	9.5	0.977723605	United States
40403	4	1	1	NA	NA	1	0.9	7.903	0.897791982	United States
40403	4	0	NA	NA	NA	1	0.9	NA	NA	United States
40403	4	2	1	1	0.9	1	0.9	1.905	0.27989498	United States
40403	4	3	1	1	0.7	1	0.9	4.594	0.662190991	United States
40403	4	5	1	1	0.888888889	1	0.9	14.944	1.174466859	United States
40403	4	10	1	1	0.818181818	1	0.9	1.887	0.2757719	United States
40404	4	8	0	1	0.636363636	1	0.625	14.273	1.154515266	United States
40404	4	0	NA	NA	NA	1	0.625	NA	NA	United States
40404	4	5	1	1	0.571428571	1	0.625	15.709	1.19614854	United States
40404	4	7	1	1	0.5	1	0.625	2.502	0.398287305	United States
40404	4	4	1	1	0.833333333	1	0.625	2.674	0.427161403	United States
40404	4	3	1	1	0.428571429	1	0.625	6.747	0.82911071	United States
40404	4	1	1	NA	NA	1	0.625	1.548	0.189770956	United States
40404	4	6	1	1	0.555555556	1	0.625	11.544	1.062356318	United States
40404	4	2	1	1	0.625	1	0.625	3.273	0.514946005	United States
40404	4	10	0	1	0.538461538	1	0.625	9.085	0.958324932	United States
40404	4	9	1	0	0.7	1	0.625	4.827	0.683677299	United States
40405	4	0	NA	NA	NA	1	0.8	NA	NA	Costa Rica
40405	4	8	1	1	0.846153846	1	0.8	6.323	0.800923182	Costa Rica
40405	4	4	1	1	0.846153846	1	0.8	6.8	0.832508913	Costa Rica
40405	4	6	1	1	0.714285714	1	0.8	3.185	0.503109437	Costa Rica
40405	4	9	1	1	0.769230769	1	0.8	4.727	0.674585602	Costa Rica
40405	4	10	1	1	0.769230769	1	0.8	19.201	1.283323848	Costa Rica
40405	4	1	1	NA	NA	1	0.8	3.906	0.591732239	Costa Rica
40405	4	5	1	1	0.846153846	1	0.8	3.568	0.552424846	Costa Rica
40405	4	2	1	1	0.8	1	0.8	10.983	1.040720984	Costa Rica
40405	4	3	1	1	0.727272727	1	0.8	3.803	0.580126325	Costa Rica
40405	4	7	1	1	0.692307692	1	0.8	5.148	0.711638538	Costa Rica
40406	4	0	NA	NA	NA	0	1	NA	NA	India
40406	4	3	0	0	0.833333333	0	1	7.856	0.895201475	India
40406	4	6	0	0	0.666666667	0	1	7.824	0.893428842	India
40406	4	10	0	0	0.625	0	1	3.161	0.499824496	India
40406	4	7	0	0	0.666666667	0	1	3.228	0.508933526	India
40406	4	5	0	0	0.666666667	0	1	2.442	0.38774566	India
40406	4	1	0	NA	NA	0	1	5.724	0.757699625	India
40406	4	9	0	0	0.5	0	1	3.563	0.551815822	India
40406	4	8	0	0	0.5	0	1	3.379	0.528788192	India
40406	4	2	0	0	1	0	1	2.108	0.323870607	India
40406	4	4	0	0	1	0	1	2.741	0.437909036	India
40407	4	0	NA	NA	NA	1	0.875	NA	NA	United States
40407	4	6	1	1	0.888888889	1	0.875	2.297	0.361160995	United States
40407	4	7	1	1	0.8	1	0.875	3.236	0.510008513	United States
40407	4	1	1	NA	NA	1	0.875	2.535	0.403977964	United States
40407	4	9	1	1	0.7	1	0.875	1.96	0.292256071	United States
40407	4	2	1	1	0.875	1	0.875	2.998	0.476831629	United States
40407	4	10	1	1	0.8	1	0.875	6.097	0.785116195	United States
40407	4	4	1	1	0.875	1	0.875	3.082	0.488832634	United States
40407	4	8	1	1	0.8	1	0.875	2.832	0.452093249	United States
40407	4	3	1	1	0.75	1	0.875	2.904	0.462996612	United States
40407	4	5	1	1	0.75	1	0.875	2.824	0.450864692	United States
40408	4	9	1	1	0.727272727	1	0.727272727	1.866	0.270911639	United States
40408	4	1	1	NA	NA	1	0.727272727	4.278	0.63124078	United States
40408	4	6	1	1	0.583333333	1	0.727272727	6.883	0.83777777	United States
40408	4	8	1	1	0.727272727	1	0.727272727	3.246	0.511348515	United States
40408	4	10	1	1	0.7	1	0.727272727	2.956	0.47070443	United States
40408	4	4	1	1	0.75	1	0.727272727	4.367	0.640183192	United States
40408	4	7	1	1	0.583333333	1	0.727272727	1.773	0.248708736	United States
40408	4	0	NA	NA	NA	1	0.727272727	NA	NA	United States
40408	4	5	1	1	0.666666667	1	0.727272727	2.442	0.38774566	United States
40408	4	3	1	1	0.666666667	1	0.727272727	2.57	0.409933123	United States
40408	4	2	1	1	0.727272727	1	0.727272727	8.102	0.908592239	United States
40410	4	8	1	1	0.666666667	1	0.75	1.708	0.232487866	United States
40410	4	9	1	1	0.8	1	0.75	1.358	0.13289977	United States
40410	4	6	1	1	0.5	1	0.75	3.254	0.512417549	United States
40410	4	0	NA	NA	NA	1	0.75	NA	NA	United States
40410	4	7	1	1	0.666666667	1	0.75	1.625	0.210853365	United States
40410	4	2	1	1	0.75	1	0.75	4.184	0.621591676	United States
40410	4	1	1	NA	NA	1	0.75	2.759	0.4407517	United States
40410	4	4	1	1	0.666666667	1	0.75	3.458	0.538824989	United States
40410	4	3	1	1	0.6	1	0.75	2.794	0.446226402	United States
40410	4	10	1	1	0.8	1	0.75	1.621	0.209783015	United States
40410	4	5	1	1	0.8	1	0.75	1.488	0.172602931	United States
40411	4	0	NA	NA	NA	0	0.666666667	NA	NA	United States
40411	4	3	0	0	0.857142857	0	0.666666667	4.281	0.631545228	United States
40411	4	9	0	0	0.285714286	0	0.666666667	1.983	0.297322714	United States
40411	4	10	0	0	0.333333333	0	0.666666667	1.896	0.277838333	United States
40411	4	4	0	0	0.75	0	0.666666667	2.487	0.395675785	United States
40411	4	6	0	0	0.714285714	0	0.666666667	17.476	1.242442036	United States
40411	4	5	0	0	0.857142857	0	0.666666667	33.786	1.528736778	United States
40411	4	1	0	NA	NA	0	0.666666667	2.47	0.392696953	United States
40411	4	2	0	0	0.666666667	0	0.666666667	7.044	0.847819347	United States
40411	4	8	0	0	0.428571429	0	0.666666667	15.443	1.188731671	United States
40411	4	7	0	0	0.428571429	0	0.666666667	2.219	0.346157302	United States
40413	4	4	1	0	0.333333333	0	0.857142857	8.214	0.914554699	Macedonia
40413	4	5	1	1	0.6	0	0.857142857	7.662	0.884342148	Macedonia
40413	4	2	0	0	0.857142857	0	0.857142857	11.144	1.047041103	Macedonia
40413	4	10	0	0	0.625	0	0.857142857	13.609	1.133826214	Macedonia
40413	4	7	0	0	0.555555556	0	0.857142857	2.123	0.326949994	Macedonia
40413	4	9	0	0	0.571428571	0	0.857142857	1.878	0.273695588	Macedonia
40413	4	0	NA	NA	NA	0	0.857142857	NA	NA	Macedonia
40413	4	1	0	NA	NA	0	0.857142857	2.565	0.409087369	Macedonia
40413	4	6	0	1	0.636363636	0	0.857142857	1.955	0.291146762	Macedonia
40413	4	3	0	0	0.4	0	0.857142857	21.251	1.327379371	Macedonia
40413	4	8	0	0	0.625	0	0.857142857	26.215	1.418549862	Macedonia
40414	4	2	1	1	0.888888889	1	0.888888889	2.946	0.469232743	United States
40414	4	0	NA	NA	NA	1	0.888888889	NA	NA	United States
40414	4	4	1	1	0.9	1	0.888888889	8.469	0.927832133	United States
40414	4	7	1	1	0.833333333	1	0.888888889	7.244	0.859978442	United States
40414	4	8	1	1	1	1	0.888888889	5.553	0.744527673	United States
40414	4	6	1	1	0.8	1	0.888888889	1.917	0.282622113	United States
40414	4	9	1	1	0.909090909	1	0.888888889	2.042	0.310055738	United States
40414	4	1	1	NA	NA	1	0.888888889	9.548	0.97991241	United States
40414	4	5	1	1	0.8	1	0.888888889	1.52	0.181843588	United States
40414	4	3	1	1	0.8	1	0.888888889	3.961	0.597804842	United States
40414	4	10	1	1	0.909090909	1	0.888888889	9.379	0.972156536	United States
40415	4	5	1	1	0.857142857	1	0.8	3.9	0.591064607	United States
40415	4	2	1	1	0.8	1	0.8	6.24	0.79518459	United States
40415	4	9	1	1	0.909090909	1	0.8	2.651	0.423409728	United States
40415	4	6	1	1	0.777777778	1	0.8	3.088	0.489677292	United States
40415	4	10	1	1	0.818181818	1	0.8	1.987	0.298197867	United States
40415	4	0	NA	NA	NA	1	0.8	NA	NA	United States
40415	4	3	1	1	0.8	1	0.8	3.287	0.516799704	United States
40415	4	7	1	1	0.8	1	0.8	2.722	0.434888121	United States
40415	4	8	1	1	0.9	1	0.8	1.779	0.250175948	United States
40415	4	1	1	NA	NA	1	0.8	5.3	0.72427587	United States
40415	4	4	1	1	0.857142857	1	0.8	3.929	0.594282029	United States
40416	4	1	1	NA	NA	1	0.75	2.29	0.359835482	United States
40416	4	2	1	1	0.75	1	0.75	6.495	0.812579155	United States
40416	4	0	NA	NA	NA	1	0.75	NA	NA	United States
40416	4	3	1	1	0.9	1	0.75	2.137	0.329804522	United States
40418	4	1	1	NA	NA	1	0.888888889	15.847	1.199947058	United States
40418	4	10	0	0	0.636363636	1	0.888888889	3.556	0.550961752	United States
40418	4	9	0	1	0.545454545	1	0.888888889	2.148	0.332034277	United States
40418	4	7	1	0	0.75	1	0.888888889	6.414	0.807128956	United States
40418	4	8	1	1	0.666666667	1	0.888888889	1.364	0.13481437	United States
40418	4	3	1	0	0.75	1	0.888888889	4.294	0.63286204	United States
40418	4	6	0	0	0.777777778	1	0.888888889	2.714	0.433609843	United States
40418	4	0	NA	NA	NA	1	0.888888889	NA	NA	United States
40418	4	5	0	0	0.8	1	0.888888889	3.926	0.593950295	United States
40418	4	4	0	1	0.727272727	1	0.888888889	3.897	0.590730406	United States
40418	4	2	0	1	0.888888889	1	0.888888889	14.747	1.16870368	United States
40419	4	0	NA	NA	NA	NA	NA	NA	NA	India
40419	4	1	0	NA	NA	NA	NA	4.127	0.615634469	India
40421	4	6	1	1	0.75	1	0.818181818	4.22	0.625312451	United States
40421	4	1	1	NA	NA	1	0.818181818	21.518	1.332801903	United States
40421	4	4	1	1	0.818181818	1	0.818181818	3.625	0.559308011	United States
40421	4	8	1	1	0.75	1	0.818181818	3.804	0.580240508	United States
40421	4	3	1	1	0.777777778	1	0.818181818	4.333	0.636788689	United States
40421	4	0	NA	NA	NA	1	0.818181818	NA	NA	United States
40421	4	10	1	1	0.75	1	0.818181818	4.816	0.682686478	United States
40421	4	9	1	1	0.666666667	1	0.818181818	3.807	0.580582877	United States
40421	4	5	1	1	0.8	1	0.818181818	4.45	0.648360011	United States
40421	4	2	1	1	0.818181818	1	0.818181818	10.682	1.028652574	United States
40421	4	7	1	1	0.75	1	0.818181818	5.679	0.754271869	United States
40422	4	7	1	1	0.75	1	0.714285714	3.456	0.538573734	United States
40422	4	9	1	1	0.777777778	1	0.714285714	2.644	0.422261451	United States
40422	4	4	1	1	0.833333333	1	0.714285714	2.81	0.44870632	United States
40422	4	10	0	1	0.642857143	1	0.714285714	3.948	0.596377144	United States
40422	4	8	1	1	0.777777778	1	0.714285714	5.204	0.716337288	United States
40422	4	2	1	1	0.714285714	1	0.714285714	3.015	0.479287316	United States
40422	4	1	1	NA	NA	1	0.714285714	2.288	0.35945602	United States
40422	4	0	NA	NA	NA	1	0.714285714	NA	NA	United States
40422	4	5	1	1	0.857142857	1	0.714285714	4.096	0.612359948	United States
40422	4	6	1	1	0.875	1	0.714285714	4.422	0.645618738	United States
40422	4	3	1	1	0.833333333	1	0.714285714	2.546	0.405858399	United States
40423	4	1	1	NA	NA	1	0.9	16.919	1.22837469	United States
40423	4	2	1	1	0.9	1	0.9	5.26	0.720985744	United States
40423	4	3	1	1	1	1	0.9	6.714	0.826981337	United States
40423	4	10	1	1	0.833333333	1	0.9	4.312	0.634678752	United States
40423	4	4	1	1	1	1	0.9	4.64	0.666517981	United States
40423	4	8	1	1	1	1	0.9	3.574	0.553154548	United States
40423	4	9	1	1	0.909090909	1	0.9	2.121	0.326540669	United States
40423	4	5	1	1	0.888888889	1	0.9	12.923	1.111363344	United States
40423	4	7	1	1	0.909090909	1	0.9	16.737	1.223677616	United States
40423	4	0	NA	NA	NA	1	0.9	NA	NA	United States
40423	4	6	1	1	0.888888889	1	0.9	1.848	0.266701967	United States
40424	4	10	0	0	0.555555556	1	0.833333333	4.365	0.639984248	United States
40424	4	4	1	1	0.777777778	1	0.833333333	6.622	0.820989176	United States
40424	4	6	0	0	0.875	1	0.833333333	7.425	0.870696458	United States
40424	4	5	0	1	1	1	0.833333333	9.581	0.98141084	United States
40424	4	8	0	0	0.666666667	1	0.833333333	19.793	1.296511625	United States
40424	4	2	0	1	0.833333333	1	0.833333333	4.642	0.666705136	United States
40424	4	7	0	0	0.666666667	1	0.833333333	4.678	0.670060217	United States
40424	4	0	NA	NA	NA	1	0.833333333	NA	NA	United States
40424	4	3	1	0	0.875	1	0.833333333	3.827	0.582858462	United States
40424	4	9	0	0	0.545454545	1	0.833333333	4.602	0.662946614	United States
40424	4	1	1	NA	NA	1	0.833333333	5.052	0.703463342	United States
40425	4	3	0	0	0.6	1	0.714285714	8.351	0.921738484	United States
40425	4	1	1	NA	NA	1	0.714285714	3.56	0.551449998	United States
40425	4	8	0	0	1	1	0.714285714	2.607	0.416141031	United States
40425	4	0	NA	NA	NA	1	0.714285714	NA	NA	United States
40425	4	9	0	0	1	1	0.714285714	2.737	0.437274797	United States
40425	4	6	0	0	1	1	0.714285714	6.531	0.814979684	United States
40425	4	4	1	0	1	1	0.714285714	5.472	0.738146089	United States
40425	4	2	0	1	0.714285714	1	0.714285714	18.907	1.276622624	United States
40425	4	10	1	0	0.833333333	1	0.714285714	11.077	1.044422156	United States
40425	4	5	0	1	1	1	0.714285714	3.487	0.542451947	United States
40425	4	7	0	0	0.8	1	0.714285714	3.255	0.512550993	United States
40500	5	6	0	0	0.2	0	0.75	9.427	0.974373507	United States
40500	5	10	0	0	0.125	0	0.75	10.723	1.030316306	United States
40500	5	7	0	0	0.333333333	0	0.75	11.907	1.075802354	United States
40500	5	2	0	0	0.75	0	0.75	5.021	0.700790221	United States
40500	5	5	0	0	0.2	0	0.75	2.886	0.460296327	United States
40500	5	8	0	0	0.142857143	0	0.75	2.125	0.327358934	United States
40500	5	4	0	0	0.4	0	0.75	2.076	0.317227349	United States
40500	5	0	NA	NA	NA	0	0.75	NA	NA	United States
40500	5	3	0	0	0.25	0	0.75	2.652	0.42357352	United States
40500	5	9	0	0	0	0	0.75	2.664	0.42553422	United States
40500	5	1	0	NA	NA	0	0.75	4.668	0.669130847	United States
40501	5	7	0	0	0.25	0	0.5	2.632	0.420285885	United States
40501	5	2	0	0	0.5	0	0.5	5.479	0.7387013	United States
40501	5	0	NA	NA	NA	0	0.5	NA	NA	United States
40501	5	6	0	0	0.285714286	0	0.5	4.753	0.676967814	United States
40501	5	5	0	0	0.333333333	0	0.5	1.934	0.28645647	United States
40501	5	4	0	0	0.428571429	0	0.5	3.32	0.521138084	United States
40501	5	1	0	NA	NA	0	0.5	3.782	0.577721525	United States
40501	5	8	0	0	0.285714286	0	0.5	2.415	0.382917135	United States
40501	5	10	0	0	0	0	0.5	3.553	0.550595207	United States
40501	5	3	0	0	0.142857143	0	0.5	8.366	0.92251786	United States
40501	5	9	0	0	0.142857143	0	0.5	2.155	0.333447274	United States
40502	5	9	0	0	0.125	0	0.625	1.491	0.173477643	United States
40502	5	2	0	0	0.625	0	0.625	3.669	0.564547712	United States
40502	5	10	0	0	0	0	0.625	1.738	0.240049772	United States
40502	5	0	NA	NA	NA	0	0.625	NA	NA	United States
40502	5	8	0	0	0.25	0	0.625	2.098	0.321805484	United States
40502	5	3	0	0	0.444444444	0	0.625	2.773	0.44294987	United States
40502	5	6	0	0	0.125	0	0.625	1.978	0.296226287	United States
40502	5	7	0	0	0.142857143	0	0.625	1.546	0.18920949	United States
40502	5	4	0	0	0.285714286	0	0.625	3.951	0.59670703	United States
40502	5	1	0	NA	NA	0	0.625	1.89	0.276461804	United States
40502	5	5	0	0	0.25	0	0.625	4.197	0.622938969	United States
40503	5	2	0	0	0.8	0	0.8	3.309	0.519696767	United States
40503	5	7	0	0	0.166666667	0	0.8	11.574	1.063483478	United States
40503	5	4	0	0	0.25	0	0.8	3.311	0.519959181	United States
40503	5	6	0	0	0.428571429	0	0.8	4.043	0.606703741	United States
40503	5	10	0	0	0.142857143	0	0.8	3.392	0.530455844	United States
40503	5	8	0	0	0.166666667	0	0.8	2.314	0.364363355	United States
40503	5	9	0	0	0	0	0.8	3.461	0.539201599	United States
40503	5	0	NA	NA	NA	0	0.8	NA	NA	United States
40503	5	1	0	NA	NA	0	0.8	3.005	0.477844476	United States
40503	5	3	0	0	0.5	0	0.8	2.583	0.412124406	United States
40503	5	5	0	0	0.375	0	0.8	1.911	0.281260687	United States
40504	5	4	0	0	0.3	1	0.666666667	3.818	0.581835924	India
40504	5	10	NA	NA	0	1	0.666666667	NA	NA	India
40504	5	0	NA	NA	NA	1	0.666666667	NA	NA	India
40504	5	5	0	0	0.3	1	0.666666667	20.273	1.30691802	India
40504	5	6	0	0	0.375	1	0.666666667	7.245	0.86003839	India
40504	5	3	0	1	0.3	1	0.666666667	5.151	0.71189155	India
40504	5	9	NA	NA	0	1	0.666666667	NA	NA	India
40504	5	2	1	1	0.666666667	1	0.666666667	7.953	0.900530982	India
40504	5	8	NA	NA	0	1	0.666666667	NA	NA	India
40504	5	7	NA	0	0	1	0.666666667	NA	NA	India
40504	5	1	1	NA	NA	1	0.666666667	7.564	0.87875152	India
40506	5	5	1	0	0.375	0	0.6	9.729	0.988068203	United States
40506	5	1	0	NA	NA	0	0.6	2.431	0.385784959	United States
40506	5	10	0	0	0.125	0	0.6	3.882	0.589055531	United States
40506	5	0	NA	NA	NA	0	0.6	NA	NA	United States
40506	5	3	0	0	0.5	0	0.6	1.784	0.25139485	United States
40506	5	8	0	1	0.111111111	0	0.6	1.96	0.292256071	United States
40506	5	7	1	0	0.166666667	0	0.6	3.532	0.548020695	United States
40506	5	6	0	1	0.222222222	0	0.6	1.972	0.294906911	United States
40506	5	9	0	0	0.111111111	0	0.6	1.504	0.177247836	United States
40506	5	2	0	0	0.6	0	0.6	1.517	0.180985581	United States
40506	5	4	0	0	0.375	0	0.6	5.313	0.725339816	United States
40507	5	5	0	1	0	0	0.666666667	4.742	0.67596155	United States
40507	5	8	0	0	0.111111111	0	0.666666667	2.923	0.465828815	United States
40507	5	3	0	0	0.2	0	0.666666667	8.239	0.915874503	United States
40507	5	6	0	0	0.222222222	0	0.666666667	4.785	0.679881942	United States
40507	5	10	0	0	0.125	0	0.666666667	3.707	0.569022586	United States
40507	5	9	0	0	0.125	0	0.666666667	2.562	0.408579125	United States
40507	5	7	0	0	0.1	0	0.666666667	2.722	0.434888121	United States
40507	5	1	0	NA	NA	0	0.666666667	6.278	0.797821311	United States
40507	5	0	NA	NA	NA	0	0.666666667	NA	NA	United States
40507	5	2	0	0	0.666666667	0	0.666666667	8.218	0.914766137	United States
40507	5	4	1	0	0.4	0	0.666666667	5.825	0.76529593	United States
40508	5	6	1	1	0.222222222	1	0.625	3.536	0.548512256	United States
40508	5	1	1	NA	NA	1	0.625	8.313	0.919757781	United States
40508	5	3	1	1	0.222222222	1	0.625	4.156	0.618675539	United States
40508	5	9	1	1	0	1	0.625	3.266	0.51401618	United States
40508	5	10	1	1	0	1	0.625	7.268	0.861414919	United States
40508	5	7	1	1	0.142857143	1	0.625	24.703	1.392749698	United States
40508	5	4	1	1	0.4	1	0.625	4.513	0.654465334	United States
40508	5	8	1	1	0.25	1	0.625	12.361	1.092053606	United States
40508	5	2	1	1	0.625	1	0.625	2.681	0.428296814	United States
40508	5	0	NA	NA	NA	1	0.625	NA	NA	United States
40508	5	5	1	1	0.111111111	1	0.625	2.997	0.476686743	United States
40509	5	10	0	0	0.1	1	0.714285714	7.741	0.888797067	United States
40509	5	3	1	0	0.428571429	1	0.714285714	6.364	0.803730171	United States
40509	5	8	1	0	0.125	1	0.714285714	4.12	0.614897216	United States
40509	5	0	NA	NA	NA	1	0.714285714	NA	NA	United States
40509	5	5	1	0	0.2	1	0.714285714	3.692	0.567261692	United States
40509	5	6	0	1	0.1	1	0.714285714	2.419	0.383635868	United States
40509	5	1	1	NA	NA	1	0.714285714	4.414	0.644832329	United States
40509	5	4	0	1	0.4	1	0.714285714	3.842	0.584557361	United States
40509	5	9	0	1	0	1	0.714285714	3.731	0.571825249	United States
40509	5	7	0	0	0.333333333	1	0.714285714	6.023	0.779812863	United States
40509	5	2	0	1	0.714285714	1	0.714285714	3.879	0.58871978	United States
40510	5	8	0	0	0.2	1	0.5	2.048	0.311329952	United States
40510	5	7	0	1	0	1	0.5	2.608	0.416307587	United States
40510	5	5	1	1	0	1	0.5	3.952	0.596816936	United States
40510	5	3	0	1	0.333333333	1	0.5	2.742	0.43806745	United States
40510	5	6	1	1	0.142857143	1	0.5	5.99	0.777426822	United States
40510	5	9	0	0	0.166666667	1	0.5	6.612	0.820332845	United States
40510	5	4	1	0	0.2	1	0.5	3.157	0.499274582	United States
40510	5	10	1	0	0	1	0.5	1.291	0.110926242	United States
40510	5	1	1	NA	NA	1	0.5	6.238	0.79504537	United States
40510	5	0	NA	NA	NA	1	0.5	NA	NA	United States
40510	5	2	1	1	0.5	1	0.5	4.694	0.671543085	United States
40511	5	6	0	0	0.363636364	1	0.555555556	4.753	0.676967814	India
40511	5	1	1	NA	NA	1	0.555555556	3.282	0.516138577	India
40511	5	0	NA	NA	NA	1	0.555555556	NA	NA	India
40511	5	8	0	0	0.285714286	1	0.555555556	2.967	0.472317546	India
40511	5	3	1	0	0.375	1	0.555555556	7.295	0.863025296	India
40511	5	4	0	1	0.2	1	0.555555556	2.906	0.46329561	India
40511	5	7	0	0	0.1	1	0.555555556	3.584	0.554368001	India
40511	5	9	0	0	0.2	1	0.555555556	5.07	0.705007959	India
40511	5	10	0	0	0	1	0.555555556	7.34	0.86569606	India
40511	5	2	0	1	0.555555556	1	0.555555556	5.429	0.734719842	India
40511	5	5	0	0	0.363636364	1	0.555555556	2.583	0.412124406	India
40512	5	3	0	1	0.428571429	1	0.666666667	2.765	0.441695136	Sweden
40512	5	10	0	0	0.333333333	1	0.666666667	2.924	0.465977368	Sweden
40512	5	7	0	0	0.5	1	0.666666667	10.663	1.027879409	Sweden
40512	5	9	0	0	0.333333333	1	0.666666667	3.007	0.478133428	Sweden
40512	5	0	NA	NA	NA	1	0.666666667	NA	NA	Sweden
40512	5	2	1	1	0.666666667	1	0.666666667	4.919	0.691876823	Sweden
40512	5	4	0	0	0.5	1	0.666666667	3.149	0.498172661	Sweden
40512	5	1	1	NA	NA	1	0.666666667	3.814	0.581380689	Sweden
40512	5	6	0	0	0.6	1	0.666666667	8.384	0.92345127	Sweden
40512	5	5	0	0	0.166666667	1	0.666666667	3.357	0.525951341	Sweden
40512	5	8	0	0	0.428571429	1	0.666666667	2.545	0.405687787	Sweden
40513	5	3	1	0	0.5	1	0.714285714	2.729	0.436003536	United States
40513	5	1	1	NA	NA	1	0.714285714	3.54	0.549003262	United States
40513	5	10	0	0	0.153846154	1	0.714285714	1.844	0.265760917	United States
40513	5	4	0	1	0.222222222	1	0.714285714	1.621	0.209783015	United States
40513	5	9	0	0	0.181818182	1	0.714285714	1.582	0.199206479	United States
40513	5	8	0	1	0.166666667	1	0.714285714	1.279	0.106870544	United States
40513	5	2	0	1	0.714285714	1	0.714285714	1.761	0.245759356	United States
40513	5	5	0	0	0.181818182	1	0.714285714	3.093	0.49037992	United States
40513	5	0	NA	NA	NA	1	0.714285714	NA	NA	United States
40513	5	7	1	0	0.222222222	1	0.714285714	2.37	0.374748346	United States
40513	5	6	0	0	0.363636364	1	0.714285714	2.61	0.416640507	United States
40515	5	4	1	1	0.333333333	1	0.333333333	9.778	0.990250033	India
40515	5	5	0	1	0.142857143	1	0.333333333	5.492	0.739730529	India
40515	5	6	1	0	0.4	1	0.333333333	2.375	0.375663614	India
40515	5	0	NA	NA	NA	1	0.333333333	NA	NA	India
40515	5	8	0	0	0.1	1	0.333333333	2.31	0.36361198	India
40515	5	9	0	0	0.222222222	1	0.333333333	3.346	0.524525937	India
40515	5	1	1	NA	NA	1	0.333333333	5.947	0.774297938	India
40515	5	2	1	1	0.333333333	1	0.333333333	5.635	0.75089392	India
40515	5	3	1	1	0.25	1	0.333333333	9.572	0.98100269	India
40515	5	10	0	0	0.25	1	0.333333333	2.418	0.383456297	India
40515	5	7	0	1	0.125	1	0.333333333	3.451	0.537944959	India
40516	5	1	0	NA	NA	0	0.333333333	2.063	0.314499228	United States
40516	5	9	0	0	0.666666667	0	0.333333333	2.554	0.407220893	United States
40516	5	3	0	0	0.333333333	0	0.333333333	1.812	0.258158193	United States
40516	5	2	0	0	0.333333333	0	0.333333333	1.903	0.279438788	United States
40516	5	10	0	0	0.333333333	0	0.333333333	2.175	0.337459261	United States
40516	5	4	0	0	0.8	0	0.333333333	1.491	0.173477643	United States
40516	5	8	0	0	0.6	0	0.333333333	1.146	0.059184618	United States
40516	5	0	NA	NA	NA	0	0.333333333	NA	NA	United States
40516	5	6	0	0	0.5	0	0.333333333	1.596	0.203032887	United States
40516	5	5	0	0	0.25	0	0.333333333	2.397	0.379668034	United States
40516	5	7	0	0	0.2	0	0.333333333	1.539	0.18723862	United States
40517	5	8	0	0	0.222222222	1	0.444444444	3.85	0.58546073	United States
40517	5	7	0	0	0.222222222	1	0.444444444	2.399	0.380030248	United States
40517	5	9	1	0	0.2	1	0.444444444	2.476	0.39375064	United States
40517	5	4	0	0	0.4	1	0.444444444	2.652	0.42357352	United States
40517	5	3	0	0	0.3	1	0.444444444	5.597	0.747955307	United States
40517	5	6	0	0	0.222222222	1	0.444444444	2.223	0.346939463	United States
40517	5	2	0	1	0.444444444	1	0.444444444	7.548	0.877831891	United States
40517	5	10	0	1	0	1	0.444444444	2.799	0.447002898	United States
40517	5	0	NA	NA	NA	1	0.444444444	NA	NA	United States
40517	5	1	1	NA	NA	1	0.444444444	4.305	0.633973156	United States
40517	5	5	0	0	0.222222222	1	0.444444444	2.004	0.301897717	United States
40600	6	5	1	1	0.785714286	1	0.8	2.754	0.439963936	United States
40600	6	6	1	1	0.785714286	1	0.8	7.318	0.864392405	United States
40600	6	2	1	1	0.8	1	0.8	2.452	0.389520466	United States
40600	6	9	1	1	0.75	1	0.8	3.063	0.486146997	United States
40600	6	10	1	1	0.727272727	1	0.8	2.273	0.356599436	United States
40600	6	7	1	1	0.785714286	1	0.8	7.101	0.851319513	United States
40600	6	8	1	1	0.769230769	1	0.8	1.8	0.255272505	United States
40600	6	3	1	1	0.8	1	0.8	3.258	0.51295108	United States
40600	6	1	1	NA	NA	1	0.8	4.736	0.675411694	United States
40600	6	4	1	1	0.8	1	0.8	2.094	0.320976677	United States
40600	6	0	NA	NA	NA	1	0.8	NA	NA	United States
40602	6	9	1	1	0.909090909	1	0.875	5.579	0.746556361	United States
40602	6	7	1	1	0.857142857	1	0.875	7.989	0.902492421	United States
40602	6	6	1	1	0.846153846	1	0.875	3.253	0.512284063	United States
40602	6	3	1	1	0.8	1	0.875	15.507	1.190527787	United States
40602	6	4	1	1	0.833333333	1	0.875	5.317	0.72566666	United States
40602	6	0	NA	NA	NA	1	0.875	NA	NA	United States
40602	6	1	1	NA	NA	1	0.875	2.961	0.471438407	United States
40602	6	8	1	1	0.916666667	1	0.875	4.9	0.69019608	United States
40602	6	5	1	1	0.846153846	1	0.875	4.586	0.66143405	United States
40602	6	2	1	1	0.875	1	0.875	15.797	1.198574618	United States
40602	6	10	1	1	0.75	1	0.875	7.139	0.853637382	United States
40603	6	1	1	NA	NA	1	0.75	13.613	1.133953845	United States
40603	6	7	1	1	1	1	0.75	12.869	1.109544801	United States
40603	6	5	1	1	1	1	0.75	14.403	1.158452961	United States
40603	6	6	1	1	0.909090909	1	0.75	6.726	0.827756863	United States
40603	6	10	1	1	0.7	1	0.75	2.081	0.31827208	United States
40603	6	4	1	1	1	1	0.75	4.116	0.614475366	United States
40603	6	8	1	1	1	1	0.75	5.854	0.767452718	United States
40603	6	9	1	1	0.8	1	0.75	6.328	0.80126647	United States
40603	6	3	1	1	0.875	1	0.75	3.981	0.599992178	United States
40603	6	2	1	1	0.75	1	0.75	11.014	1.041945072	United States
40603	6	0	NA	NA	NA	1	0.75	NA	NA	United States
40604	6	3	1	1	1	1	0.75	4.48	0.651278014	United States
40604	6	2	1	1	0.75	1	0.75	4.486	0.651859269	United States
40604	6	9	1	1	1	1	0.75	3.13	0.495544338	United States
40604	6	7	1	1	1	1	0.75	3.141	0.497067936	United States
40604	6	4	1	1	1	1	0.75	2.687	0.429267666	United States
40604	6	5	1	1	1	1	0.75	8.141	0.910677755	United States
40604	6	10	1	1	1	1	0.75	8.512	0.930031615	United States
40604	6	6	1	1	1	1	0.75	2.27	0.356025857	United States
40604	6	1	1	NA	NA	1	0.75	6.128	0.787318757	United States
40604	6	0	NA	NA	NA	1	0.75	NA	NA	United States
40604	6	8	1	1	1	1	0.75	4.88	0.688419822	United States
40605	6	9	0	0	1	0	0.625	1.482	0.170848204	India
40605	6	10	0	0	0.75	0	0.625	2.06	0.31386722	India
40605	6	4	0	0	0.666666667	0	0.625	2.006	0.302330929	India
40605	6	6	0	0	0.666666667	0	0.625	6.418	0.807399713	India
40605	6	8	0	0	0.75	0	0.625	6.981	0.843917638	India
40605	6	1	0	NA	NA	0	0.625	3.257	0.512817759	India
40605	6	0	NA	NA	NA	0	0.625	NA	NA	India
40605	6	5	0	0	0.714285714	0	0.625	2.191	0.340642378	India
40605	6	3	0	0	0.666666667	0	0.625	1.629	0.211921084	India
40605	6	7	0	0	0.6	0	0.625	3.258	0.51295108	India
40605	6	2	0	0	0.625	0	0.625	1.563	0.193958978	India
40607	6	4	1	1	0.833333333	1	0.75	13.932	1.144013466	United States
40607	6	10	1	1	0.777777778	1	0.75	2.305	0.36267093	United States
40607	6	6	1	1	0.818181818	1	0.75	2.557	0.407730728	United States
40607	6	2	1	1	0.75	1	0.75	1.767	0.24723655	United States
40607	6	8	1	1	0.818181818	1	0.75	2.081	0.31827208	United States
40607	6	5	1	1	0.818181818	1	0.75	3.725	0.571126277	United States
40607	6	7	1	1	0.833333333	1	0.75	2.133	0.328990855	United States
40607	6	3	1	1	0.777777778	1	0.75	3.636	0.560623875	United States
40607	6	0	NA	NA	NA	1	0.75	NA	NA	United States
40607	6	9	1	1	0.888888889	1	0.75	2.244	0.351022853	United States
40607	6	1	1	NA	NA	1	0.75	2.021	0.305566314	United States
40608	6	6	0	0	0.666666667	0	0.6	3.975	0.599337133	India
40608	6	10	0	0	1	0	0.6	3.549	0.550105999	India
40608	6	3	0	0	0.666666667	0	0.6	2.525	0.402261382	India
40608	6	4	0	0	0.5	0	0.6	1.997	0.300378065	India
40608	6	1	0	NA	NA	0	0.6	7.33	0.865103975	India
40608	6	5	0	0	0.666666667	0	0.6	2.786	0.444981112	India
40608	6	7	0	0	0.6	0	0.6	2.2	0.342422681	India
40608	6	9	0	0	0.8	0	0.6	3.54	0.549003262	India
40608	6	0	NA	NA	NA	0	0.6	NA	NA	India
40608	6	2	0	0	0.6	0	0.6	3.777	0.577146985	India
40608	6	8	0	0	0.6	0	0.6	1.999	0.300812794	India
40609	6	3	1	1	0.875	1	0.75	2.825	0.451018452	United States
40609	6	7	1	1	1	1	0.75	2.299	0.361538971	United States
40609	6	10	NA	NA	0	1	0.75	NA	NA	United States
40609	6	4	1	1	0.888888889	1	0.75	10.99	1.040997692	United States
40609	6	0	NA	NA	NA	1	0.75	NA	NA	United States
40609	6	6	1	1	0.909090909	1	0.75	4.939	0.693639026	United States
40609	6	2	1	1	0.75	1	0.75	4.223	0.625621081	United States
40609	6	5	1	1	0.818181818	1	0.75	2.959	0.471144965	United States
40609	6	1	1	NA	NA	1	0.75	3.388	0.529943402	United States
40609	6	9	NA	1	0	1	0.75	NA	NA	United States
40609	6	8	1	1	1	1	0.75	2.614	0.417305583	United States
40611	6	5	1	1	1	1	1	2.47	0.392696953	United States
40611	6	0	NA	NA	NA	1	1	NA	NA	United States
40611	6	8	1	1	1	1	1	2.754	0.439963936	United States
40611	6	9	1	1	1	1	1	2.293	0.360404055	United States
40611	6	10	1	1	0.9	1	1	2.2	0.342422681	United States
40611	6	3	1	1	1	1	1	2.835	0.452553063	United States
40611	6	7	1	1	1	1	1	2.42	0.383815366	United States
40611	6	1	1	NA	NA	1	1	5.136	0.710625015	United States
40611	6	6	1	1	1	1	1	2.146	0.331629718	United States
40611	6	4	1	1	1	1	1	3.458	0.538824989	United States
40611	6	2	1	1	1	1	1	3.29	0.517195898	United States
40612	6	9	1	1	0.909090909	1	0.666666667	6.207	0.792881745	United States
40612	6	1	1	NA	NA	1	0.666666667	4.913	0.691346764	United States
40612	6	0	NA	NA	NA	1	0.666666667	NA	NA	United States
40612	6	10	1	1	0.9	1	0.666666667	5.437	0.735359333	United States
40612	6	2	1	1	0.666666667	1	0.666666667	17.92	1.253338005	United States
40612	6	4	1	1	0.888888889	1	0.666666667	3.405	0.532117116	United States
40612	6	5	1	1	0.9	1	0.666666667	6.588	0.81875359	United States
40612	6	3	1	1	0.875	1	0.666666667	4.48	0.651278014	United States
40612	6	6	1	1	1	1	0.666666667	3.026	0.480868924	United States
40612	6	8	1	1	0.916666667	1	0.666666667	2.906	0.46329561	United States
40612	6	7	1	1	0.9	1	0.666666667	3.391	0.53032779	United States
40613	6	2	1	1	1	1	1	9.714	0.987398099	United States
40613	6	0	NA	NA	NA	1	1	NA	NA	United States
40613	6	4	1	1	1	1	1	5.621	0.749813585	United States
40613	6	3	1	1	1	1	1	7.247	0.860158261	United States
40613	6	5	1	1	1	1	1	4.93	0.692846919	United States
40613	6	6	1	1	1	1	1	5.155	0.71222867	United States
40613	6	1	1	NA	NA	1	1	7.562	0.878636673	United States
40614	6	7	1	1	1	1	1	3.664	0.563955465	United States
40614	6	5	1	1	1	1	1	4.15	0.618048097	United States
40614	6	0	NA	NA	NA	1	1	NA	NA	United States
40614	6	3	1	1	1	1	1	5.039	0.702344358	United States
40614	6	6	1	1	1	1	1	3.542	0.549248557	United States
40614	6	1	1	NA	NA	1	1	3.306	0.519302849	United States
40614	6	2	1	1	1	1	1	5.328	0.726564216	United States
40614	6	4	1	1	1	1	1	4.229	0.626237685	United States
40614	6	10	0	0	1	1	1	13.895	1.142858551	United States
40614	6	9	0	1	1	1	1	4.094	0.612147838	United States
40614	6	8	1	1	1	1	1	4.935	0.693287157	United States
40615	6	6	1	1	1	1	1	2.334	0.368100852	United States
40615	6	10	1	1	0.9	1	1	3.329	0.522313795	United States
40615	6	9	1	1	1	1	1	2.992	0.475961589	United States
40615	6	3	1	1	1	1	1	2.254	0.352953912	United States
40615	6	1	1	NA	NA	1	1	3.727	0.571359393	United States
40615	6	2	1	1	1	1	1	4.195	0.622731965	United States
40615	6	7	1	1	1	1	1	3.371	0.527758753	United States
40615	6	0	NA	NA	NA	1	1	NA	NA	United States
40615	6	4	1	1	1	1	1	2.245	0.351216345	United States
40615	6	8	1	1	1	1	1	3.958	0.59747579	United States
40615	6	5	1	1	1	1	1	3.254	0.512417549	United States
40616	6	3	1	1	1	0	0.75	13.676	1.135959092	United States
40616	6	5	1	1	1	0	0.75	13.173	1.119684692	United States
40616	6	2	1	0	0.75	0	0.75	10.195	1.00838723	United States
40616	6	10	1	1	0.818181818	0	0.75	19.836	1.2974541	United States
40616	6	1	0	NA	NA	0	0.75	19.297	1.285489797	United States
40616	6	6	1	1	1	0	0.75	10.311	1.013300787	United States
40616	6	8	1	1	0.909090909	0	0.75	5.869	0.76856411	United States
40616	6	9	1	1	0.9	0	0.75	5.496	0.740046724	United States
40616	6	7	1	1	0.916666667	0	0.75	13.106	1.117470164	United States
40616	6	0	NA	NA	NA	0	0.75	NA	NA	United States
40616	6	4	1	1	1	0	0.75	16.585	1.219715476	United States
40618	6	0	NA	NA	NA	0	0.5	NA	NA	United States
40618	6	8	0	0	0.8	0	0.5	3.361	0.526468512	United States
40618	6	4	0	0	0.666666667	0	0.5	1.51	0.178976947	United States
40618	6	2	0	0	0.5	0	0.5	4.867	0.687261346	United States
40618	6	6	0	0	0.666666667	0	0.5	14.747	1.16870368	United States
40618	6	9	0	0	0.833333333	0	0.5	1.55	0.190331698	United States
40618	6	1	0	NA	NA	0	0.5	31.217	1.494391164	United States
40618	6	7	0	0	0.714285714	0	0.5	18.452	1.266043446	United States
40618	6	3	0	0	0.666666667	0	0.5	24.107	1.382143168	United States
40618	6	10	0	0	0.833333333	0	0.5	1.382	0.140508043	United States
40618	6	5	0	0	0.666666667	0	0.5	8.813	0.94512377	United States
40619	6	7	1	1	0.8	1	0.777777778	2.234	0.349083169	India
40619	6	3	1	1	0.75	1	0.777777778	4.991	0.69818757	India
40619	6	8	1	1	0.818181818	1	0.777777778	4.618	0.664453929	India
40619	6	1	1	NA	NA	1	0.777777778	3.789	0.578524605	India
40619	6	0	NA	NA	NA	1	0.777777778	NA	NA	India
40619	6	10	1	1	0.8	1	0.777777778	4.798	0.681060244	India
40619	6	2	1	1	0.777777778	1	0.777777778	10.516	1.021850577	India
40619	6	4	1	1	0.818181818	1	0.777777778	2.977	0.473778835	India
40619	6	6	1	1	0.666666667	1	0.777777778	2.217	0.345765693	India
40619	6	9	1	1	0.8	1	0.777777778	3.515	0.545925329	India
40619	6	5	1	1	0.7	1	0.777777778	2.963	0.471731651	India
40700	7	2	1	0	0.4	0	0.4	3.53	0.547774705	United States
40700	7	8	0	0	0.5	0	0.4	2.655	0.424064525	United States
40700	7	6	1	0	0.4	0	0.4	2.988	0.475380593	United States
40700	7	4	0	0	0.6	0	0.4	4.631	0.665674781	United States
40700	7	1	0	NA	NA	0	0.4	6.609	0.820135752	United States
40700	7	0	NA	NA	NA	0	0.4	NA	NA	United States
40700	7	5	0	0	0.4	0	0.4	3.829	0.583085366	United States
40700	7	9	0	0	0.2	0	0.4	3.528	0.547528576	United States
40700	7	7	0	1	0.6	0	0.4	4.191	0.622317661	United States
40700	7	3	0	1	0.4	0	0.4	4.888	0.689131197	United States
40700	7	10	0	0	0.2	0	0.4	3.022	0.48029446	United States
40701	7	10	0	0	0.142857143	0	0.6	2.893	0.461348434	Romania
40701	7	0	NA	NA	NA	0	0.6	NA	NA	Romania
40701	7	8	0	0	0.272727273	0	0.6	2.584	0.412292509	Romania
40701	7	6	0	1	0.454545455	0	0.6	3.15	0.498310554	Romania
40701	7	7	0	0	0.6	0	0.6	2.057	0.313234292	Romania
40701	7	1	0	NA	NA	0	0.6	6.001	0.778223627	Romania
40701	7	5	1	1	0.555555556	0	0.6	3.65	0.562292864	Romania
40701	7	3	1	0	0.666666667	0	0.6	3.711	0.569490954	Romania
40701	7	4	1	1	0.333333333	0	0.6	2.638	0.421274791	Romania
40701	7	9	0	0	0.5	0	0.6	16.646	1.22130989	Romania
40701	7	2	0	0	0.6	0	0.6	2.44	0.387389826	Romania
40702	7	4	0	1	0.416666667	1	0.625	3.843	0.584670384	United States
40702	7	2	1	1	0.625	1	0.625	5.475	0.738384124	United States
40702	7	3	1	1	0.727272727	1	0.625	2.08	0.318063335	United States
40702	7	0	NA	NA	NA	1	0.625	NA	NA	United States
40702	7	6	1	0	0.285714286	1	0.625	1.569	0.195622944	United States
40702	7	10	0	0	0	1	0.625	1.821	0.260309946	United States
40702	7	7	1	1	0.5	1	0.625	2.315	0.364550995	United States
40702	7	9	0	1	0.090909091	1	0.625	2.239	0.350054094	United States
40702	7	5	0	0	0.333333333	1	0.625	1.598	0.203576775	United States
40702	7	8	1	1	0.5	1	0.625	1.773	0.248708736	United States
40702	7	1	1	NA	NA	1	0.625	2.247	0.351603072	United States
40703	7	6	1	1	0.5	1	0.875	7.734	0.888404168	United States
40703	7	3	1	1	0.888888889	1	0.875	10.125	1.005395032	United States
40703	7	9	1	1	0.285714286	1	0.875	7.414	0.870052582	United States
40703	7	10	0	1	0.25	1	0.875	8.372	0.92282922	United States
40703	7	0	NA	NA	NA	1	0.875	NA	NA	United States
40703	7	1	1	NA	NA	1	0.875	4.576	0.660486016	United States
40703	7	2	1	1	0.875	1	0.875	9.119	0.959947216	United States
40703	7	7	1	1	0.625	1	0.875	6.245	0.795532443	United States
40703	7	5	1	1	0.714285714	1	0.875	8.369	0.922673568	United States
40703	7	8	1	1	0.5	1	0.875	19.424	1.288338669	United States
40703	7	4	1	1	0.75	1	0.875	15.652	1.194569839	United States
40704	7	2	1	0	0.428571429	0	0.428571429	4.167	0.6198235	United States
40704	7	10	0	0	0.181818182	0	0.428571429	1.931	0.285782274	United States
40704	7	5	0	1	0.384615385	0	0.428571429	2.422	0.384174139	United States
40704	7	6	0	0	0.307692308	0	0.428571429	2.283	0.358505911	United States
40704	7	8	1	0	0.166666667	0	0.428571429	2.233	0.348888723	United States
40704	7	9	0	1	0.3	0	0.428571429	2.357	0.372359583	United States
40704	7	4	1	0	0.375	0	0.428571429	2.422	0.384174139	United States
40704	7	7	0	0	0.4	0	0.428571429	4.972	0.69653112	United States
40704	7	0	NA	NA	NA	0	0.428571429	NA	NA	United States
40704	7	3	0	1	0.5	0	0.428571429	2.47	0.392696953	United States
40704	7	1	0	NA	NA	0	0.428571429	9.475	0.976579219	United States
40705	7	1	0	NA	NA	0	0.636363636	2.638	0.421274791	India
40705	7	4	0	0	0.2	0	0.636363636	3.127	0.495127881	India
40705	7	5	0	0	0.333333333	0	0.636363636	3.513	0.54567815	India
40705	7	10	0	0	0.25	0	0.636363636	2.269	0.355834496	India
40705	7	0	NA	NA	NA	0	0.636363636	NA	NA	India
40705	7	3	0	0	0.8	0	0.636363636	2.645	0.422425676	India
40705	7	6	0	0	0.285714286	0	0.636363636	2.328	0.366982976	India
40705	7	7	0	0	0.333333333	0	0.636363636	2.826	0.451172158	India
40705	7	2	0	0	0.636363636	0	0.636363636	2.268	0.35564305	India
40705	7	9	0	0	0.166666667	0	0.636363636	3.158	0.499412126	India
40705	7	8	0	0	0	0	0.636363636	2.254	0.352953912	India
40706	7	5	0	0	0	0	0.555555556	1.237	0.0923697	United States
40706	7	6	0	0	0.285714286	0	0.555555556	1.609	0.206556044	United States
40706	7	3	0	0	0.75	0	0.555555556	3.133	0.495960395	United States
40706	7	7	0	0	0.444444444	0	0.555555556	10.675	1.028367884	United States
40706	7	8	0	0	0.222222222	0	0.555555556	2.372	0.375114685	United States
40706	7	0	NA	NA	NA	0	0.555555556	NA	NA	United States
40706	7	10	0	0	0.111111111	0	0.555555556	9.012	0.954821183	United States
40706	7	1	0	NA	NA	0	0.555555556	6.085	0.784260583	United States
40706	7	9	0	0	0.125	0	0.555555556	2.624	0.418963831	United States
40706	7	4	0	0	0.555555556	0	0.555555556	2.591	0.413467413	United States
40706	7	2	0	0	0.555555556	0	0.555555556	4.545	0.657533888	United States
40707	7	3	0	1	0.777777778	0	0.25	3.819	0.581949658	United States
40707	7	4	0	0	0.444444444	0	0.25	3.056	0.48515335	United States
40707	7	6	1	0	0.444444444	0	0.25	15.894	1.201233209	United States
40707	7	1	0	NA	NA	0	0.25	18.186	1.259737187	United States
40707	7	8	1	0	0.428571429	0	0.25	3.366	0.527114112	United States
40707	7	2	1	0	0.25	0	0.25	8.349	0.921634461	United States
40707	7	10	0	0	0.222222222	0	0.25	16.089	1.206529052	United States
40707	7	7	0	1	0.454545455	0	0.25	2.344	0.369957607	United States
40707	7	5	0	0	0.444444444	0	0.25	2.252	0.352568386	United States
40707	7	0	NA	NA	NA	0	0.25	NA	NA	United States
40707	7	9	0	1	0.25	0	0.25	3.016	0.479431337	United States
40709	7	2	1	0	0.6	0	0.6	4.682	0.670431409	United States
40709	7	8	0	1	0.5	0	0.6	3.793	0.578982843	United States
40709	7	4	1	1	0.666666667	0	0.6	4.2	0.62324929	United States
40709	7	0	NA	NA	NA	0	0.6	NA	NA	United States
40709	7	7	1	1	0.666666667	0	0.6	9.376	0.972017599	United States
40709	7	10	0	0	0.142857143	0	0.6	2.104	0.323045735	United States
40709	7	6	1	0	0.625	0	0.6	2.068	0.315550534	United States
40709	7	9	0	0	0.428571429	0	0.6	7.941	0.899875196	United States
40709	7	1	0	NA	NA	0	0.6	5.406	0.732876041	United States
40709	7	3	1	1	0.818181818	0	0.6	3.836	0.583878598	United States
40709	7	5	0	1	0.454545455	0	0.6	1.887	0.2757719	United States
40710	7	6	0	0	0.428571429	1	0.583333333	2.321	0.36567514	United States
40710	7	2	1	1	0.583333333	1	0.583333333	7.404	0.86946641	United States
40710	7	3	1	1	0.833333333	1	0.583333333	11.826	1.072837875	United States
40710	7	4	0	1	0.6	1	0.583333333	9.602	0.982361702	United States
40710	7	10	0	0	0.25	1	0.583333333	2.917	0.464936429	United States
40710	7	9	0	0	0.25	1	0.583333333	1.924	0.284205068	United States
40710	7	1	1	NA	NA	1	0.583333333	8.149	0.911104318	United States
40710	7	0	NA	NA	NA	1	0.583333333	NA	NA	United States
40710	7	7	0	0	0.272727273	1	0.583333333	10.284	1.012162068	United States
40710	7	8	0	0	0.25	1	0.583333333	2.851	0.454997217	United States
40710	7	5	0	0	0.571428571	1	0.583333333	2.76	0.440909082	United States
40711	7	0	NA	NA	NA	1	0.8	NA	NA	United States
40711	7	1	1	NA	NA	1	0.8	7.74	0.888740961	United States
40711	7	2	1	1	0.8	1	0.8	4.639	0.666424373	United States
40712	7	2	1	1	0.75	1	0.75	4.173	0.620448385	United States
40712	7	1	1	NA	NA	1	0.75	6.531	0.814979684	United States
40712	7	0	NA	NA	NA	1	0.75	NA	NA	United States
40712	7	8	0	1	0.181818182	1	0.75	4.638	0.666330744	United States
40712	7	3	1	1	0.9	1	0.75	2.335	0.368286885	United States
40712	7	5	1	1	0.5	1	0.75	6.185	0.791339704	United States
40712	7	10	0	0	0.076923077	1	0.75	2.957	0.470851325	United States
40712	7	9	0	0	0.307692308	1	0.75	10.202	1.008685319	United States
40712	7	4	1	1	0.75	1	0.75	5.257	0.720737977	United States
40712	7	6	0	1	0.25	1	0.75	2.202	0.342817315	United States
40712	7	7	1	0	0.333333333	1	0.75	1.963	0.2929203	United States
40713	7	7	0	1	0.375	1	0	1.7	0.230448921	Russia
40713	7	5	1	0	0.4	1	0	1.979	0.296445794	Russia
40713	7	3	0	0	0.555555556	1	0	2.046	0.310905629	Russia
40713	7	8	0	0	0.3125	1	0	1.686	0.22685757	Russia
40713	7	10	0	0	0.071428571	1	0	2.378	0.37621185	Russia
40713	7	0	NA	NA	NA	1	0	NA	NA	Russia
40713	7	2	0	1	0	1	0	2.347	0.37051309	Russia
40713	7	6	1	1	0.363636364	1	0	1.749	0.242789809	Russia
40713	7	9	0	0	0.333333333	1	0	1.77	0.247973266	Russia
40713	7	1	1	NA	NA	1	0	5.626	0.750199728	Russia
40713	7	4	0	0	0.333333333	1	0	1.876	0.273232834	Russia
40714	7	9	0	1	0	0	0.714285714	3.047	0.483872454	United States
40714	7	4	1	0	0.5	0	0.714285714	3.168	0.500785173	United States
40714	7	0	NA	NA	NA	0	0.714285714	NA	NA	United States
40714	7	6	0	1	0.2	0	0.714285714	3.008	0.478277832	United States
40714	7	8	1	0	0.2	0	0.714285714	3.101	0.491501766	United States
40714	7	10	0	0	0.2	0	0.714285714	2.964	0.471878199	United States
40714	7	7	0	0	0.4	0	0.714285714	4.026	0.604873771	United States
40714	7	3	0	1	0.714285714	0	0.714285714	2.745	0.438542349	United States
40714	7	5	1	1	0.4	0	0.714285714	9.203	0.963929422	United States
40714	7	1	0	NA	NA	0	0.714285714	4.223	0.625621081	United States
40714	7	2	1	0	0.714285714	0	0.714285714	6.85	0.835690571	United States
40715	7	1	1	NA	NA	1	0.461538462	3.87	0.587710965	United States
40715	7	8	0	1	0.4	1	0.461538462	26.325	1.42036838	United States
40715	7	4	0	0	0.615384615	1	0.461538462	5.243	0.719579858	United States
40715	7	3	0	1	0.615384615	1	0.461538462	6.979	0.843793198	United States
40715	7	0	NA	NA	NA	1	0.461538462	NA	NA	United States
40715	7	6	0	1	0.363636364	1	0.461538462	27.445	1.438463235	United States
40715	7	2	1	1	0.461538462	1	0.461538462	6.218	0.793650718	United States
40715	7	9	NA	0	0	1	0.461538462	NA	NA	United States
40715	7	10	NA	NA	0	1	0.461538462	NA	NA	United States
40715	7	7	1	0	0.571428571	1	0.461538462	20.901	1.320167065	United States
40715	7	5	1	0	0.384615385	1	0.461538462	10.269	1.011528154	United States
40716	7	6	0	0	0.333333333	1	0.375	2.287	0.359266165	United States
40716	7	5	0	0	0.3	1	0.375	5.434	0.735119634	United States
40716	7	1	1	NA	NA	1	0.375	5.385	0.731185708	United States
40716	7	8	0	0	0.2	1	0.375	1.942	0.288249226	United States
40716	7	7	0	0	0.3	1	0.375	7.781	0.891035415	United States
40716	7	4	0	0	0.444444444	1	0.375	2.269	0.355834496	United States
40716	7	2	0	1	0.375	1	0.375	4.43	0.646403726	United States
40716	7	9	0	0	0.1	1	0.375	3.497	0.543695632	United States
40716	7	10	0	0	0.090909091	1	0.375	11.895	1.075364446	United States
40716	7	3	0	0	0.625	1	0.375	13.503	1.130430268	United States
40716	7	0	NA	NA	NA	1	0.375	NA	NA	United States
40717	7	7	1	1	0.545454545	0	0.5	3.473	0.540704783	United States
40717	7	6	1	1	0.571428571	0	0.5	3.064	0.486288761	United States
40717	7	5	1	0	0.375	0	0.5	2.776	0.443419462	United States
40717	7	10	0	0	0.153846154	0	0.5	4.405	0.643945913	United States
40717	7	8	0	1	0.3	0	0.5	3.404	0.531989551	United States
40717	7	0	NA	NA	NA	0	0.5	NA	NA	United States
40717	7	9	0	0	0.416666667	0	0.5	6.024	0.779884963	United States
40717	7	2	1	0	0.5	0	0.5	4.609	0.663606708	United States
40717	7	3	1	1	0.5	0	0.5	4.05	0.607455023	United States
40717	7	1	0	NA	NA	0	0.5	12.219	1.087035665	United States
40717	7	4	0	1	0.3	0	0.5	3.667	0.56431091	United States
40718	7	1	1	NA	NA	1	0.454545455	3.384	0.529430354	United States
40718	7	10	0	0	0.166666667	1	0.454545455	5.144	0.71130096	United States
40718	7	8	0	0	0.363636364	1	0.454545455	17.173	1.23484617	United States
40718	7	4	0	1	0.583333333	1	0.454545455	10.637	1.026819159	United States
40718	7	3	1	1	0.692307692	1	0.454545455	8.759	0.942454526	United States
40718	7	6	1	0	0.3	1	0.454545455	8.811	0.945025201	United States
40718	7	0	NA	NA	NA	1	0.454545455	NA	NA	United States
40718	7	5	0	0	0.428571429	1	0.454545455	6.681	0.824841472	United States
40718	7	2	1	1	0.454545455	1	0.454545455	3.335	0.523095838	United States
40718	7	9	0	0	0.333333333	1	0.454545455	8.638	0.9364132	United States
40718	7	7	0	1	0.416666667	1	0.454545455	10.156	1.006722692	United States
40719	7	7	0	0	0.5	0	0.75	3.1	0.491361694	United States
40719	7	4	0	0	0.6	0	0.75	2.183	0.339053736	United States
40719	7	5	0	0	0.428571429	0	0.75	3.95	0.596597096	United States
40719	7	10	0	0	0.2	0	0.75	4.026	0.604873771	United States
40719	7	2	0	0	0.75	0	0.75	14.072	1.148355826	United States
40719	7	0	NA	NA	NA	0	0.75	NA	NA	United States
40719	7	6	0	0	0.4	0	0.75	2.685	0.42894429	United States
40719	7	9	0	0	0.2	0	0.75	3.095	0.490660653	United States
40719	7	3	0	0	0.833333333	0	0.75	18.004	1.255369004	United States
40719	7	8	0	0	0.6	0	0.75	2.113	0.324899497	United States
40719	7	1	0	NA	NA	0	0.75	8.671	0.938069186	United States
40720	7	7	0	0	0.266666667	1	0.571428571	3.17	0.501059262	United States
40720	7	6	0	0	0.466666667	1	0.571428571	7.634	0.882752156	United States
40720	7	8	0	0	0.266666667	1	0.571428571	3.97	0.598790507	United States
40720	7	5	0	1	0.357142857	1	0.571428571	2.6	0.414973348	United States
40720	7	3	1	1	0.888888889	1	0.571428571	1.792	0.253338005	United States
40720	7	2	1	1	0.571428571	1	0.571428571	1.895	0.277609214	United States
40720	7	9	1	0	0.25	1	0.571428571	6.523	0.814447379	United States
40720	7	0	NA	NA	NA	1	0.571428571	NA	NA	United States
40720	7	4	1	1	0.6	1	0.571428571	1.909	0.280805928	United States
40720	7	1	1	NA	NA	1	0.571428571	6.759	0.829882446	United States
40720	7	10	0	1	0.142857143	1	0.571428571	2.145	0.331427297	United States
40721	7	7	0	0	0.428571429	0	0.666666667	1.937	0.287129621	India
40721	7	8	0	0	0.285714286	0	0.666666667	2.463	0.391464412	India
40721	7	10	0	0	0.166666667	0	0.666666667	2.141	0.330616667	India
40721	7	6	0	0	0	0	0.666666667	2.437	0.386855529	India
40721	7	3	0	0	0.833333333	0	0.666666667	2.357	0.372359583	India
40721	7	4	0	0	0.428571429	0	0.666666667	2.965	0.472024698	India
40721	7	0	NA	NA	NA	0	0.666666667	NA	NA	India
40721	7	5	0	0	0.142857143	0	0.666666667	2.49	0.396199347	India
40721	7	2	0	0	0.666666667	0	0.666666667	7.279	0.862071719	India
40721	7	1	0	NA	NA	0	0.666666667	3.706	0.568905415	India
40721	7	9	0	0	0.142857143	0	0.666666667	2.328	0.366982976	India
40722	7	7	1	1	0.75	1	0.4	3.662	0.56371834	United States
40722	7	2	1	1	0.4	1	0.4	5.37	0.729974286	United States
40722	7	5	0	1	0.6	1	0.4	2.312	0.36398783	United States
40722	7	0	NA	NA	NA	1	0.4	NA	NA	United States
40722	7	6	1	0	0.666666667	1	0.4	4.282	0.631646663	United States
40722	7	4	1	0	0.6	1	0.4	4.195	0.622731965	United States
40722	7	9	1	0	0.4	1	0.4	1.914	0.281941933	United States
40722	7	1	1	NA	NA	1	0.4	5.975	0.77633791	United States
40722	7	10	0	1	0.333333333	1	0.4	2.395	0.379305518	United States
40722	7	8	0	1	0.4	1	0.4	3.72	0.57054294	United States
40722	7	3	0	1	0.714285714	1	0.4	1.871	0.272073788	United States
40723	7	10	0	0	0.125	1	0.7	4.147	0.617734035	United States
40723	7	5	1	1	0.666666667	1	0.7	5.935	0.773420723	United States
40723	7	4	1	1	0.8	1	0.7	3.176	0.501880494	United States
40723	7	6	0	1	0.5	1	0.7	7.527	0.876621916	United States
40723	7	7	0	0	0.4	1	0.7	4.349	0.638389408	United States
40723	7	8	1	0	0.6	1	0.7	7.656	0.884001925	United States
40723	7	2	1	1	0.7	1	0.7	4.473	0.650598898	United States
40723	7	3	1	1	0.818181818	1	0.7	7.972	0.90156729	United States
40723	7	0	NA	NA	NA	1	0.7	NA	NA	United States
40723	7	1	1	NA	NA	1	0.7	24.224	1.384245858	United States
40723	7	9	0	1	0	1	0.7	3.953	0.596926814	United States
40800	8	1	1	NA	NA	1	0.875	5.314	0.72542155	United States
40800	8	10	1	1	0.5	1	0.875	5.574	0.746166964	United States
40800	8	6	1	1	0.933333333	1	0.875	2.236	0.349471799	United States
40800	8	3	1	1	0.9	1	0.875	2.584	0.412292509	United States
40800	8	4	1	1	0.928571429	1	0.875	2.549	0.406369835	United States
40800	8	7	1	1	0.764705882	1	0.875	3.076	0.487986331	United States
40800	8	8	1	1	0.647058824	1	0.875	3.609	0.557386882	United States
40800	8	2	1	1	0.875	1	0.875	2.386	0.377670439	United States
40800	8	9	1	1	0.6875	1	0.875	2.751	0.43949059	United States
40800	8	0	NA	NA	NA	1	0.875	NA	NA	United States
40800	8	5	1	1	0.8	1	0.875	2.666	0.425860145	United States
40801	8	10	1	0	0.6	0	0.833333333	2.457	0.390405156	India
40801	8	1	0	NA	NA	0	0.833333333	7.5	0.875061263	India
40801	8	0	NA	NA	NA	0	0.833333333	NA	NA	India
40801	8	7	0	1	0.916666667	0	0.833333333	4.782	0.679609572	India
40801	8	6	1	1	1	0	0.833333333	6.23	0.794488047	India
40801	8	8	1	0	0.833333333	0	0.833333333	5.95	0.774516966	India
40801	8	5	1	0	0.875	0	0.833333333	3.811	0.581038949	India
40801	8	3	0	1	1	0	0.833333333	5.419	0.733919151	India
40801	8	9	0	1	0.769230769	0	0.833333333	2.86	0.456366033	India
40801	8	2	1	0	0.833333333	0	0.833333333	6.395	0.805840549	India
40801	8	4	0	0	1	0	0.833333333	7.816	0.892984551	India
40802	8	4	1	1	0.882352941	1	0.916666667	3.905	0.591621038	United States
40802	8	8	1	1	0.6875	1	0.916666667	2.167	0.335858911	United States
40802	8	9	0	1	0.714285714	1	0.916666667	2.172	0.336859821	United States
40802	8	0	NA	NA	NA	1	0.916666667	NA	NA	United States
40802	8	3	1	1	0.875	1	0.916666667	3.566	0.552181339	United States
40802	8	1	1	NA	NA	1	0.916666667	2.535	0.403977964	United States
40802	8	7	1	1	0.875	1	0.916666667	3.724	0.571009672	United States
40802	8	10	0	0	0.545454545	1	0.916666667	5.38	0.730782276	United States
40802	8	2	1	1	0.916666667	1	0.916666667	2.327	0.366796383	United States
40802	8	6	1	1	0.866666667	1	0.916666667	2.512	0.400019635	United States
40802	8	5	1	1	0.75	1	0.916666667	6.185	0.791339704	United States
40803	8	8	1	1	0.714285714	1	1	4.175	0.62065648	United States
40803	8	7	1	1	0.833333333	1	1	2.086	0.319314304	United States
40803	8	3	1	1	0.833333333	1	1	7.031	0.847017098	United States
40803	8	4	1	1	0.9	1	1	6.853	0.835880732	United States
40803	8	6	1	1	0.916666667	1	1	6.152	0.789016327	United States
40803	8	9	1	1	0.846153846	1	1	3.071	0.487279816	United States
40803	8	5	1	1	0.818181818	1	1	2.547	0.406028945	United States
40803	8	1	1	NA	NA	1	1	5.048	0.703119346	United States
40803	8	10	1	1	0.4375	1	1	9.43	0.974511693	United States
40803	8	0	NA	NA	NA	1	1	NA	NA	United States
40803	8	2	1	1	1	1	1	8.415	0.92505412	United States
40804	8	10	0	0	0.333333333	1	0.8	8.762	0.942603249	United States
40804	8	1	1	NA	NA	1	0.8	5.979	0.776628553	United States
40804	8	0	NA	NA	NA	1	0.8	NA	NA	United States
40804	8	9	0	0	0.6	1	0.8	4.789	0.680244837	United States
40804	8	8	0	0	0.7	1	0.8	1.979	0.296445794	United States
40804	8	5	0	0	0.692307692	1	0.8	16.621	1.220657149	United States
40804	8	2	1	1	0.8	1	0.8	6.219	0.793720557	United States
40804	8	7	0	1	0.666666667	1	0.8	13.054	1.115743608	United States
40804	8	4	0	1	0.933333333	1	0.8	1.901	0.278982117	United States
40804	8	3	1	1	0.928571429	1	0.8	4.439	0.647285145	United States
40804	8	6	1	0	0.818181818	1	0.8	5.478	0.738622028	United States
40805	8	0	NA	NA	NA	1	0.666666667	NA	NA	United States
40805	8	3	1	1	0.833333333	1	0.666666667	20.049	1.302092716	United States
40805	8	5	1	1	0.6	1	0.666666667	12.456	1.0953786	United States
40805	8	7	1	1	0.666666667	1	0.666666667	25.035	1.398547596	United States
40805	8	2	1	1	0.666666667	1	0.666666667	19.866	1.298110431	United States
40805	8	1	1	NA	NA	1	0.666666667	12.648	1.102021857	United States
40805	8	6	1	1	0.866666667	1	0.666666667	9.192	0.963410016	United States
40805	8	4	1	1	0.714285714	1	0.666666667	17.415	1.240923479	United States
40806	8	4	1	1	0.833333333	1	0.777777778	3.101	0.491501766	United States
40806	8	3	1	1	1	1	0.777777778	3.05	0.484299839	United States
40806	8	8	1	1	0.733333333	1	0.777777778	22.486	1.351912206	United States
40806	8	0	NA	NA	NA	1	0.777777778	NA	NA	United States
40806	8	1	1	NA	NA	1	0.777777778	3.52	0.546542663	United States
40806	8	7	1	1	0.866666667	1	0.777777778	2.751	0.43949059	United States
40806	8	2	1	1	0.777777778	1	0.777777778	3.968	0.598571663	United States
40806	8	9	1	1	0.714285714	1	0.777777778	2.526	0.402433346	United States
40806	8	10	0	1	0.571428571	1	0.777777778	4.762	0.677789391	United States
40806	8	5	1	1	0.692307692	1	0.777777778	2.654	0.423900919	United States
40806	8	6	1	1	1	1	0.777777778	4.34	0.63748973	United States
40807	8	5	1	1	0.818181818	1	0.888888889	7.752	0.889413764	United States
40807	8	2	1	1	0.888888889	1	0.888888889	7.429	0.870930358	United States
40807	8	6	1	1	1	1	0.888888889	4.52	0.655138435	United States
40807	8	4	1	1	0.846153846	1	0.888888889	7.94	0.899820502	United States
40807	8	10	1	1	0.636363636	1	0.888888889	10.078	1.003374354	United States
40807	8	9	1	1	0.769230769	1	0.888888889	3.516	0.546048866	United States
40807	8	0	NA	NA	NA	1	0.888888889	NA	NA	United States
40807	8	7	1	1	0.846153846	1	0.888888889	4.314	0.634880141	United States
40807	8	1	1	NA	NA	1	0.888888889	13.049	1.115577231	United States
40807	8	3	1	1	0.923076923	1	0.888888889	3.349	0.524915148	United States
40807	8	8	1	1	0.769230769	1	0.888888889	4.049	0.607347777	United States
40808	8	3	1	1	1	1	1	3.498	0.543819805	United States
40808	8	1	1	NA	NA	1	1	10.8	1.033423755	United States
40808	8	2	1	1	1	1	1	4.455	0.648847708	United States
40808	8	0	NA	NA	NA	1	1	NA	NA	United States
40809	8	10	0	0	0.545454545	1	0.875	3.33	0.522444234	United States
40809	8	3	0	1	0.909090909	1	0.875	14.924	1.17388524	United States
40809	8	7	1	1	0.769230769	1	0.875	9.093	0.958707191	United States
40809	8	2	1	1	0.875	1	0.875	9.386	0.97248055	United States
40809	8	1	1	NA	NA	1	0.875	5.105	0.707995746	United States
40809	8	4	0	0	0.888888889	1	0.875	5.812	0.764325606	United States
40809	8	6	1	1	0.888888889	1	0.875	13.262	1.122609024	United States
40809	8	0	NA	NA	NA	1	0.875	NA	NA	United States
40809	8	8	0	1	0.625	1	0.875	9.789	0.990738329	United States
40809	8	5	1	0	0.75	1	0.875	4.611	0.663795122	United States
40809	8	9	0	0	0.727272727	1	0.875	2.287	0.359266165	United States
40811	8	7	1	1	0.916666667	1	0.888888889	3.218	0.50758604	United States
40811	8	2	1	1	0.888888889	1	0.888888889	9.385	0.972434277	United States
40811	8	6	1	1	0.923076923	1	0.888888889	5.159	0.712565528	United States
40811	8	10	0	1	0.538461538	1	0.888888889	3.473	0.540704783	United States
40811	8	4	1	1	0.916666667	1	0.888888889	12.322	1.090681204	United States
40811	8	3	1	1	0.9	1	0.888888889	7.511	0.875697762	United States
40811	8	9	1	1	0.692307692	1	0.888888889	15.286	1.184293855	United States
40811	8	5	1	1	0.785714286	1	0.888888889	8.847	0.946796027	United States
40811	8	1	1	NA	NA	1	0.888888889	7.518	0.876102321	United States
40811	8	0	NA	NA	NA	1	0.888888889	NA	NA	United States
40811	8	8	1	1	0.75	1	0.888888889	3.089	0.489817908	United States
40812	8	8	0	0	0.8	0	0.75	2.996	0.476541809	United States
40812	8	6	1	1	0.833333333	0	0.75	2.78	0.444044796	United States
40812	8	4	1	1	0.888888889	0	0.75	6.682	0.824906471	United States
40812	8	9	1	0	0.875	0	0.75	2.347	0.37051309	United States
40812	8	1	0	NA	NA	0	0.75	7.45	0.872156273	United States
40812	8	5	1	1	0.8	0	0.75	5.217	0.717420837	United States
40812	8	10	1	1	0.75	0	0.75	4.322	0.635684763	United States
40812	8	3	1	1	0.571428571	0	0.75	8.244	0.916137983	United States
40812	8	7	0	1	0.846153846	0	0.75	6.152	0.789016327	United States
40812	8	0	NA	NA	NA	0	0.75	NA	NA	United States
40812	8	2	1	0	0.75	0	0.75	5.776	0.761627185	United States
40813	8	5	1	1	0.75	0	0.6	2.814	0.449324093	India
40813	8	10	0	0	0.461538462	0	0.6	7.821	0.893262286	India
40813	8	8	0	0	0.615384615	0	0.6	3.015	0.479287316	India
40813	8	3	1	1	0.909090909	0	0.6	2.788	0.445292769	India
40813	8	4	1	1	0.846153846	0	0.6	2.637	0.42111013	India
40813	8	7	0	0	0.769230769	0	0.6	3.006	0.477988976	India
40813	8	1	0	NA	NA	0	0.6	8.068	0.90676589	India
40813	8	0	NA	NA	NA	0	0.6	NA	NA	India
40813	8	6	0	1	0.857142857	0	0.6	6.133	0.787672965	India
40813	8	2	1	0	0.6	0	0.6	2.854	0.455453969	India
40813	8	9	0	0	0.666666667	0	0.6	2.951	0.469969209	India
40814	8	9	1	1	0.6	1	0.714285714	4.028	0.605089462	United States
40814	8	2	1	1	0.714285714	1	0.714285714	8.469	0.927832133	United States
40814	8	5	1	1	0.714285714	1	0.714285714	5.025	0.701136066	United States
40814	8	7	1	1	0.785714286	1	0.714285714	4.322	0.635684763	United States
40814	8	8	1	1	0.588235294	1	0.714285714	8.674	0.938219418	United States
40814	8	10	1	1	0.538461538	1	0.714285714	4.576	0.660486016	United States
40814	8	3	1	1	1	1	0.714285714	4.905	0.690639012	United States
40814	8	4	1	1	0.923076923	1	0.714285714	5.661	0.752893155	United States
40814	8	0	NA	NA	NA	1	0.714285714	NA	NA	United States
40814	8	1	1	NA	NA	1	0.714285714	9.218	0.964636704	United States
40814	8	6	1	1	0.928571429	1	0.714285714	4.657	0.668106238	United States
40815	8	3	1	1	0.7	0	0.9	5.068	0.704836606	United States
40815	8	10	0	0	0.5	0	0.9	9.05	0.956648579	United States
40815	8	9	0	1	0.75	0	0.9	2.648	0.422917981	United States
40815	8	2	1	0	0.9	0	0.9	2.909	0.463743721	United States
40815	8	1	0	NA	NA	0	0.9	8.82	0.945468585	United States
40815	8	4	0	1	0.818181818	0	0.9	4.016	0.603793704	United States
40815	8	6	1	1	0.75	0	0.9	8.861	0.947482737	United States
40815	8	0	NA	NA	NA	0	0.9	NA	NA	United States
40815	8	8	1	1	0.714285714	0	0.9	5.761	0.760497875	United States
40815	8	5	1	0	0.636363636	0	0.9	4.916	0.691611874	United States
40815	8	7	1	1	0.769230769	0	0.9	4.932	0.693023068	United States
40816	8	7	0	0	0.545454545	1	0.571428571	10.219	1.009408399	United States
40816	8	8	0	0	0.454545455	1	0.571428571	10.209	1.008983204	United States
40816	8	10	0	0	0.25	1	0.571428571	2.84	0.45331834	United States
40816	8	6	0	0	0.7	1	0.571428571	2.504	0.398634325	United States
40816	8	1	1	NA	NA	1	0.571428571	1.553	0.191171456	United States
40816	8	9	0	0	0.333333333	1	0.571428571	5.766	0.760874638	United States
40816	8	3	1	1	0.777777778	1	0.571428571	2.378	0.37621185	United States
40816	8	4	0	1	0.692307692	1	0.571428571	4.07	0.609594409	United States
40816	8	0	NA	NA	NA	1	0.571428571	NA	NA	United States
40816	8	5	0	0	0.5	1	0.571428571	3.295	0.517855419	United States
40816	8	2	1	1	0.571428571	1	0.571428571	2.56	0.408239965	United States
40817	8	5	1	1	0.714285714	1	0.666666667	5.202	0.716170348	United States
40817	8	2	0	1	0.666666667	1	0.666666667	4.382	0.641672373	United States
40817	8	3	1	0	0.857142857	1	0.666666667	7.745	0.889021422	United States
40817	8	4	1	1	0.875	1	0.666666667	2.889	0.460747542	United States
40817	8	1	1	NA	NA	1	0.666666667	2.87	0.457881897	United States
40817	8	0	NA	NA	NA	1	0.666666667	NA	NA	United States
40817	8	10	NA	NA	0	1	0.666666667	NA	NA	United States
40817	8	7	NA	NA	0.5	1	0.666666667	NA	NA	United States
40817	8	8	NA	NA	0	1	0.666666667	NA	NA	United States
40817	8	6	NA	1	0.5	1	0.666666667	NA	NA	United States
40817	8	9	NA	NA	0.5	1	0.666666667	NA	NA	United States
40818	8	2	0	0	0.5	0	0.5	1.852	0.267640982	India
40818	8	8	0	0	0.2	0	0.5	6.43	0.808210973	India
40818	8	1	0	NA	NA	0	0.5	2.932	0.467163966	India
40818	8	6	0	0	0.666666667	0	0.5	7.65	0.883661435	India
40818	8	9	0	0	0.4	0	0.5	7.9	0.897627091	India
40818	8	3	0	0	0.5	0	0.5	2.311	0.363799945	India
40818	8	5	0	0	0.6	0	0.5	8.4	0.924279286	India
40818	8	4	0	0	0.6	0	0.5	2.362	0.373279893	India
40818	8	0	NA	NA	NA	0	0.5	NA	NA	India
40818	8	7	0	0	0.25	0	0.5	8.398	0.92417587	India
40818	8	10	0	0	0.4	0	0.5	3.868	0.587486465	India
40819	8	6	1	1	0.8	1	0.571428571	5.367	0.729731595	United States
40819	8	4	1	1	0.714285714	1	0.571428571	4.773	0.678791434	United States
40819	8	10	1	1	0.7	1	0.571428571	5.542	0.743666521	United States
40819	8	9	1	1	0.75	1	0.571428571	17.598	1.245463313	United States
40819	8	0	NA	NA	NA	1	0.571428571	NA	NA	United States
40819	8	1	1	NA	NA	1	0.571428571	3.586	0.554610285	United States
40819	8	7	1	1	0.857142857	1	0.571428571	5.272	0.721975402	United States
40819	8	5	1	1	0.571428571	1	0.571428571	4.807	0.681874122	United States
40819	8	8	1	1	0.642857143	1	0.571428571	4.86	0.686636269	United States
40819	8	2	1	1	0.571428571	1	0.571428571	5.936	0.773493892	United States
40819	8	3	1	1	0.777777778	1	0.571428571	7.205	0.857633985	United States
40820	8	5	1	1	0.818181818	1	0.888888889	3.213	0.506910726	United States
40820	8	6	1	1	0.916666667	1	0.888888889	4.041	0.60648885	United States
40820	8	8	1	1	0.692307692	1	0.888888889	2.704	0.432006687	United States
40820	8	9	1	1	0.727272727	1	0.888888889	7.243	0.859918485	United States
40820	8	3	1	1	1	1	0.888888889	3.908	0.591954555	United States
40820	8	10	0	1	0.636363636	1	0.888888889	10.608	1.025633511	United States
40820	8	4	1	1	0.909090909	1	0.888888889	3.749	0.57391544	United States
40820	8	1	1	NA	NA	1	0.888888889	2.938	0.468051791	United States
40820	8	7	1	1	0.75	1	0.888888889	5.058	0.703978825	United States
40820	8	0	NA	NA	NA	1	0.888888889	NA	NA	United States
40820	8	2	1	1	0.888888889	1	0.888888889	9.195	0.963551734	United States
40821	8	7	0	0	0.5	0	0.666666667	2.301	0.361916619	United States
40821	8	9	0	0	0.333333333	0	0.666666667	2.17	0.336459734	United States
40821	8	0	NA	NA	NA	0	0.666666667	NA	NA	United States
40821	8	6	0	0	0.666666667	0	0.666666667	2.603	0.415474168	United States
40821	8	10	0	0	0.142857143	0	0.666666667	3.138	0.496652939	United States
40821	8	2	0	0	0.666666667	0	0.666666667	3.119	0.494015375	United States
40821	8	3	0	0	0.75	0	0.666666667	2.27	0.356025857	United States
40821	8	1	0	NA	NA	0	0.666666667	2.394	0.379124146	United States
40821	8	4	0	0	0.777777778	0	0.666666667	2.615	0.417471693	United States
40821	8	8	0	0	0.444444444	0	0.666666667	3.258	0.51295108	United States
40821	8	5	0	0	0.5	0	0.666666667	4.266	0.630020851	United States
40822	8	10	0	0	0.727272727	1	0.9	4.549	0.657915937	United States
40822	8	6	0	1	0.928571429	1	0.9	15.267	1.183753706	United States
40822	8	2	1	1	0.9	1	0.9	4.609	0.663606708	United States
40822	8	7	0	0	0.846153846	1	0.9	2.775	0.443262987	United States
40822	8	1	1	NA	NA	1	0.9	17.431	1.241322303	United States
40822	8	3	1	1	0.846153846	1	0.9	13.297	1.123753669	United States
40822	8	8	0	0	0.846153846	1	0.9	9.563	0.980594156	United States
40822	8	9	0	0	0.769230769	1	0.9	8.509	0.929878524	United States
40822	8	5	1	1	0.8	1	0.9	34.047	1.532078851	United States
40822	8	0	NA	NA	NA	1	0.9	NA	NA	United States
40822	8	4	1	1	0.875	1	0.9	11.719	1.068890554	United States
40823	8	3	0	0	0.9	1	0.727272727	9.368	0.971646882	United States
40823	8	8	1	0	0.571428571	1	0.727272727	17.129	1.233732009	United States
40823	8	0	NA	NA	NA	1	0.727272727	NA	NA	United States
40823	8	2	0	1	0.727272727	1	0.727272727	3.507	0.544935766	United States
40823	8	5	1	0	0.333333333	1	0.727272727	12.079	1.082030981	United States
40823	8	1	1	NA	NA	1	0.727272727	12.864	1.109376031	United States
40823	8	10	0	0	0.333333333	1	0.727272727	4.017	0.603901832	United States
40823	8	9	0	1	0.4	1	0.727272727	4.107	0.613524703	United States
40823	8	7	0	0	0.7	1	0.727272727	3.504	0.544564097	United States
40823	8	6	0	1	0.636363636	1	0.727272727	4.786	0.679972694	United States
40823	8	4	0	0	0.7	1	0.727272727	3.523	0.546912643	United States
40900	9	9	1	0	0.545454545	1	0.8	15.976	1.203468052	United States
40900	9	8	0	1	0.818181818	1	0.8	12.518	1.097534947	United States
40900	9	5	1	1	0.769230769	1	0.8	5.301	0.724357804	United States
40900	9	1	1	NA	NA	1	0.8	6.719	0.827304641	United States
40900	9	2	1	1	0.8	1	0.8	4.612	0.663889299	United States
40900	9	10	0	1	0.333333333	1	0.8	3.328	0.522183318	United States
40900	9	3	1	1	0.916666667	1	0.8	3.316	0.520614522	United States
40900	9	7	1	1	0.75	1	0.8	3.11	0.492760389	United States
40900	9	4	1	1	0.714285714	1	0.8	3.018	0.479719235	United States
40900	9	6	1	1	0.833333333	1	0.8	3.022	0.48029446	United States
40900	9	0	NA	NA	NA	1	0.8	NA	NA	United States
40901	9	9	0	0	0.428571429	1	1	5.953	0.774735883	United States
40901	9	5	1	1	0.692307692	1	1	4.58	0.660865478	United States
40901	9	7	0	1	0.625	1	1	9.56	0.980457892	United States
40901	9	4	1	1	0.727272727	1	1	11.561	1.062995401	United States
40901	9	2	1	1	1	1	1	3.296	0.517987203	United States
40901	9	3	1	1	1	1	1	2.765	0.441695136	United States
40901	9	8	0	0	0.571428571	1	1	2.015	0.30427505	United States
40901	9	10	0	0	0.166666667	1	1	17.089	1.23271665	United States
40901	9	0	NA	NA	NA	1	1	NA	NA	United States
40901	9	6	1	1	0.785714286	1	1	6.269	0.79719827	United States
40901	9	1	1	NA	NA	1	1	11.301	1.053116875	United States
40902	9	3	0	1	0.727272727	1	0.7	3.375	0.528273777	United States
40902	9	7	1	0	0.666666667	1	0.7	5.375	0.730378469	United States
40902	9	10	0	0	0.2	1	0.7	12.123	1.083610105	United States
40902	9	4	1	0	0.7	1	0.7	11.969	1.078057867	United States
40902	9	1	1	NA	NA	1	0.7	3.965	0.598243192	United States
40902	9	5	0	1	0.555555556	1	0.7	2.115	0.325310372	United States
40902	9	6	0	0	0.777777778	1	0.7	3.123	0.494571984	United States
40902	9	0	NA	NA	NA	1	0.7	NA	NA	United States
40902	9	9	0	0	0.4	1	0.7	3.772	0.576571684	United States
40902	9	8	0	1	0.6	1	0.7	3.234	0.509740016	United States
40902	9	2	1	1	0.7	1	0.7	3.692	0.567261692	United States
40903	9	7	1	1	0.8	1	0.909090909	3.549	0.550105999	United States
40903	9	9	0	1	0.4	1	0.909090909	3.352	0.52530401	United States
40903	9	3	1	1	0.923076923	1	0.909090909	2.247	0.351603072	United States
40903	9	5	1	1	0.785714286	1	0.909090909	2.723	0.435047641	United States
40903	9	2	1	1	0.909090909	1	0.909090909	2.721	0.434728542	United States
40903	9	1	1	NA	NA	1	0.909090909	3.305	0.519171464	United States
40903	9	6	1	1	0.928571429	1	0.909090909	2.156	0.333648757	United States
40903	9	8	1	1	0.6	1	0.909090909	1.928	0.28510703	United States
40903	9	10	0	0	0.333333333	1	0.909090909	3.882	0.589055531	United States
40903	9	0	NA	NA	NA	1	0.909090909	NA	NA	United States
40903	9	4	1	1	0.857142857	1	0.909090909	3.585	0.55448916	United States
40904	9	3	1	1	0.857142857	1	1	6.76	0.829946696	United States
40904	9	10	0	0	0.1	1	1	6.379	0.804752602	United States
40904	9	9	0	0	0.444444444	1	1	3.507	0.544935766	United States
40904	9	1	1	NA	NA	1	1	5.907	0.771366971	United States
40904	9	7	0	1	0.8	1	1	3.066	0.486572151	United States
40904	9	0	NA	NA	NA	1	1	NA	NA	United States
40904	9	8	0	0	0.555555556	1	1	2.79	0.445604203	United States
40904	9	5	0	1	0.875	1	1	7.094	0.850891184	United States
40904	9	4	1	1	0.75	1	1	6.279	0.797890483	United States
40904	9	6	1	0	1	1	1	9.292	0.968109201	United States
40904	9	2	1	1	1	1	1	6.287	0.79844346	United States
40905	9	8	0	0	0.769230769	1	0.888888889	1.622	0.21005085	United States
40905	9	0	NA	NA	NA	1	0.888888889	NA	NA	United States
40905	9	1	1	NA	NA	1	0.888888889	4.599	0.66266341	United States
40905	9	5	1	1	0.8	1	0.888888889	4.014	0.603577368	United States
40905	9	7	0	1	0.833333333	1	0.888888889	2.941	0.468495025	United States
40905	9	9	0	0	0.461538462	1	0.888888889	2.653	0.42373725	United States
40905	9	4	1	0	0.888888889	1	0.888888889	1.979	0.296445794	United States
40905	9	6	1	1	0.833333333	1	0.888888889	26.091	1.416490725	United States
40905	9	3	0	1	0.888888889	1	0.888888889	1.643	0.215637563	United States
40905	9	10	0	0	0.285714286	1	0.888888889	7.13	0.85308953	United States
40905	9	2	1	1	0.888888889	1	0.888888889	3.033	0.48187241	United States
40906	9	2	1	1	0.777777778	1	0.777777778	3.407	0.532372134	United States
40906	9	1	1	NA	NA	1	0.777777778	11.793	1.071624299	United States
40906	9	0	NA	NA	NA	1	0.777777778	NA	NA	United States
40906	9	3	0	1	0.75	1	0.777777778	8.527	0.930796263	United States
40907	9	1	1	NA	NA	1	0.777777778	2.381	0.376759395	India
40907	9	0	NA	NA	NA	1	0.777777778	NA	NA	India
40907	9	10	0	0	0.428571429	1	0.777777778	2.316	0.364738555	India
40907	9	4	1	1	0.833333333	1	0.777777778	2.383	0.377124042	India
40907	9	7	0	1	0.818181818	1	0.777777778	2.412	0.382377303	India
40907	9	9	0	0	0.5	1	0.777777778	3.208	0.50623436	India
40907	9	3	1	1	0.8	1	0.777777778	4.103	0.613101517	India
40907	9	6	1	1	0.833333333	1	0.777777778	3.468	0.540079089	India
40907	9	5	1	1	0.833333333	1	0.777777778	3.939	0.595385981	India
40907	9	8	0	0	0.8	1	0.777777778	5.217	0.717420837	India
40907	9	2	1	1	0.777777778	1	0.777777778	3.083	0.488973525	India
40908	9	9	0	0	0.444444444	1	0.857142857	3.886	0.589502796	United States
40908	9	4	0	0	0.636363636	1	0.857142857	3.17	0.501059262	United States
40908	9	1	1	NA	NA	1	0.857142857	5.61	0.748962861	United States
40908	9	2	1	1	0.857142857	1	0.857142857	4.04	0.606381365	United States
40908	9	0	NA	NA	NA	1	0.857142857	NA	NA	United States
40908	9	3	0	1	0.9	1	0.857142857	2.863	0.456821348	United States
40908	9	5	1	0	0.8	1	0.857142857	4.694	0.671543085	United States
40908	9	7	0	1	0.727272727	1	0.857142857	3.871	0.587823171	United States
40908	9	10	0	0	0.222222222	1	0.857142857	8.246	0.91624333	United States
40908	9	8	0	0	0.7	1	0.857142857	2.668	0.426185825	United States
40908	9	6	1	1	0.666666667	1	0.857142857	24.973	1.397470717	United States
40909	9	8	0	0	0.333333333	0	0.6	2.733	0.436639632	United States
40909	9	9	0	0	0.333333333	0	0.6	2.647	0.422753941	United States
40909	9	4	0	0	0.5	0	0.6	3.799	0.579669294	United States
40909	9	6	0	0	0.75	0	0.6	4.493	0.652536419	United States
40909	9	2	0	0	0.6	0	0.6	4.318	0.635282638	United States
40909	9	3	0	0	0.666666667	0	0.6	4.323	0.635785236	United States
40909	9	5	0	0	0.75	0	0.6	3.385	0.529558673	United States
40909	9	1	0	NA	NA	0	0.6	4.679	0.670153045	United States
40909	9	0	NA	NA	NA	0	0.6	NA	NA	United States
40909	9	10	0	0	0	0	0.6	3.124	0.494711025	United States
40909	9	7	0	0	0.5	0	0.6	2.584	0.412292509	United States
40910	9	5	1	1	0.818181818	1	0.888888889	3.055	0.485011215	Finland
40910	9	0	NA	NA	NA	1	0.888888889	NA	NA	Finland
40910	9	6	1	1	0.833333333	1	0.888888889	3.447	0.537441283	Finland
40910	9	2	1	1	0.888888889	1	0.888888889	3.95	0.596597096	Finland
40910	9	1	1	NA	NA	1	0.888888889	3.142	0.497206181	Finland
40910	9	4	1	1	0.833333333	1	0.888888889	5.213	0.717087725	Finland
40910	9	8	1	1	0.692307692	1	0.888888889	3.272	0.514813295	Finland
40910	9	7	1	1	0.692307692	1	0.888888889	3.175	0.50174373	Finland
40910	9	9	1	1	0.5	1	0.888888889	4.847	0.68547302	Finland
40910	9	10	1	1	0.333333333	1	0.888888889	5.028	0.701395269	Finland
40910	9	3	1	1	0.8	1	0.888888889	3.949	0.596487134	Finland
40911	9	0	NA	NA	NA	1	0.75	NA	NA	United States
40911	9	10	0	0	0.454545455	1	0.75	3.64	0.561101384	United States
40911	9	1	1	NA	NA	1	0.75	9.25	0.966141733	United States
40911	9	7	1	1	0.727272727	1	0.75	13.569	1.132547842	United States
40911	9	8	1	1	0.8	1	0.75	13.62	1.134177108	United States
40911	9	2	1	1	0.75	1	0.75	6.106	0.7857568	United States
40911	9	3	1	1	0.777777778	1	0.75	4.31	0.63447727	United States
40911	9	9	0	1	0.454545455	1	0.75	6.683	0.824971461	United States
40911	9	4	0	1	0.636363636	1	0.75	10.209	1.008983204	United States
40911	9	6	1	1	0.727272727	1	0.75	9.015	0.954965731	United States
40911	9	5	1	0	0.8	1	0.75	5.137	0.710709566	United States
40912	9	0	NA	NA	NA	0	0.857142857	NA	NA	India
40912	9	5	0	0	0.4	0	0.857142857	2.782	0.444357126	India
40912	9	2	0	0	0.857142857	0	0.857142857	5.083	0.70612011	India
40912	9	10	0	0	0	0	0.857142857	3.243	0.510946949	India
40912	9	3	0	0	0.666666667	0	0.857142857	2.883	0.459844642	India
40912	9	7	0	0	0.666666667	0	0.857142857	3.741	0.572987708	India
40912	9	8	0	0	0.25	0	0.857142857	2.518	0.401055726	India
40912	9	1	0	NA	NA	0	0.857142857	10.622	1.026206297	India
40912	9	9	0	0	0.25	0	0.857142857	2.429	0.385427515	India
40912	9	6	0	0	0.8	0	0.857142857	3.056	0.48515335	India
40912	9	4	0	0	0.5	0	0.857142857	2.65	0.423245874	India
40913	9	4	1	1	0.833333333	1	1	3.201	0.505285674	United States
40913	9	2	1	1	1	1	1	11.939	1.076967952	United States
40913	9	10	0	1	0.444444444	1	1	2.841	0.453471234	United States
40913	9	3	1	1	1	1	1	14.937	1.174263381	United States
40913	9	8	0	1	0.615384615	1	1	2.136	0.329601248	United States
40913	9	9	1	0	0.545454545	1	1	7.224	0.858777737	United States
40913	9	1	1	NA	NA	1	1	5.187	0.714916248	United States
40913	9	0	NA	NA	NA	1	1	NA	NA	United States
40913	9	5	1	1	0.769230769	1	1	9.239	0.965624967	United States
40913	9	7	1	1	0.846153846	1	1	2.502	0.398287305	United States
40913	9	6	1	1	0.785714286	1	1	2.401	0.38039216	United States
40914	9	0	NA	NA	NA	0	0.5	NA	NA	India
40914	9	4	0	0	0.666666667	0	0.5	5.119	0.70918513	India
40914	9	9	0	0	0.428571429	0	0.5	1.904	0.279666944	India
40914	9	6	0	0	0.625	0	0.5	2.342	0.369586891	India
40914	9	5	0	0	0.428571429	0	0.5	9.947	0.997692118	India
40914	9	8	0	0	0.428571429	0	0.5	2.092	0.32056168	India
40914	9	3	0	0	0.428571429	0	0.5	3.933	0.594723946	India
40914	9	1	0	NA	NA	0	0.5	5.895	0.770483809	India
40914	9	7	0	0	0.428571429	0	0.5	2.01	0.303196057	India
40914	9	2	0	0	0.5	0	0.5	3.199	0.50501424	India
40914	9	10	0	0	0.125	0	0.5	2.049	0.311541958	India
40915	9	5	0	0	0.857142857	0	0.8	6.91	0.839478047	India
40915	9	4	0	1	0.625	0	0.8	4.774	0.678882415	India
40915	9	1	0	NA	NA	0	0.8	3.237	0.510142699	India
40915	9	2	0	0	0.8	0	0.8	6.224	0.794069584	India
40915	9	3	1	0	0.8	0	0.8	6.354	0.80304721	India
40915	9	10	0	0	0.333333333	0	0.8	3.462	0.539327064	India
40915	9	6	0	0	0.714285714	0	0.8	3.718	0.570309385	India
40915	9	0	NA	NA	NA	0	0.8	NA	NA	India
40915	9	9	0	0	0.5	0	0.8	9.55	0.980003372	India
40915	9	7	0	0	0.8	0	0.8	5.717	0.757168192	India
40915	9	8	0	0	0.833333333	0	0.8	4.218	0.625106575	India
40916	9	9	1	1	0.4	1	0.909090909	5.347	0.728110184	United States
40916	9	10	0	1	0.333333333	1	0.909090909	2.403	0.380753771	United States
40916	9	3	1	1	0.923076923	1	0.909090909	2.82	0.450249108	United States
40916	9	7	1	0	0.866666667	1	0.909090909	2.816	0.44963265	United States
40916	9	6	0	1	0.785714286	1	0.909090909	3.365	0.526985069	United States
40916	9	1	1	NA	NA	1	0.909090909	3.239	0.510410948	United States
40916	9	8	1	1	0.642857143	1	0.909090909	3.027	0.481012421	United States
40916	9	2	1	1	0.909090909	1	0.909090909	2.216	0.345569756	United States
40916	9	0	NA	NA	NA	1	0.909090909	NA	NA	United States
40916	9	4	1	1	0.692307692	1	0.909090909	4.619	0.664547962	United States
40916	9	5	1	1	0.769230769	1	0.909090909	1.932	0.286007122	United States
40917	9	10	1	0	0.272727273	1	0.625	10.312	1.013342904	United States
40917	9	7	1	0	0.818181818	1	0.625	3.468	0.540079089	United States
40917	9	0	NA	NA	NA	1	0.625	NA	NA	United States
40917	9	1	1	NA	NA	1	0.625	3.759	0.575072326	United States
40917	9	4	1	1	0.666666667	1	0.625	2.34	0.369215857	United States
40917	9	6	0	1	0.75	1	0.625	7.487	0.874307833	United States
40917	9	2	0	1	0.625	1	0.625	3.871	0.587823171	United States
40917	9	5	1	1	0.9	1	0.625	2.86	0.456366033	United States
40917	9	9	0	1	0.461538462	1	0.625	29.963	1.476585294	United States
40917	9	8	1	1	0.583333333	1	0.625	4.949	0.694517454	United States
40917	9	3	1	0	0.666666667	1	0.625	2.583	0.412124406	United States
40918	9	3	1	1	1	1	0.875	4.063	0.608846822	United States
40918	9	9	0	0	0.5	1	0.875	1.997	0.300378065	United States
40918	9	10	0	0	0.416666667	1	0.875	13.74	1.137986733	United States
40918	9	1	1	NA	NA	1	0.875	2.17	0.336459734	United States
40918	9	7	1	1	0.846153846	1	0.875	3.518	0.546295835	United States
40918	9	0	NA	NA	NA	1	0.875	NA	NA	United States
40918	9	5	1	1	0.909090909	1	0.875	3.837	0.583991799	United States
40918	9	4	1	1	0.909090909	1	0.875	4.253	0.628695383	United States
40918	9	8	0	1	0.692307692	1	0.875	5.294	0.723783937	United States
40918	9	2	1	1	0.875	1	0.875	6.583	0.818423855	United States
40918	9	6	1	1	1	1	0.875	3.129	0.495405563	United States
40919	9	6	1	1	0.642857143	1	0.75	2.44	0.387389826	United States
40919	9	1	1	NA	NA	1	0.75	2.931	0.467015818	United States
40919	9	3	1	1	0.9	1	0.75	2.892	0.461198289	United States
40919	9	8	1	1	0.529411765	1	0.75	2.964	0.471878199	United States
40919	9	2	1	1	0.75	1	0.75	2.707	0.432488256	United States
40919	9	10	0	0	0.2	1	0.75	2.051	0.31196566	United States
40919	9	7	1	1	0.588235294	1	0.75	7.201	0.857392811	United States
40919	9	4	1	1	0.666666667	1	0.75	3.725	0.571126277	United States
40919	9	9	0	1	0.294117647	1	0.75	2.872	0.458184436	United States
40919	9	5	1	1	0.833333333	1	0.75	2.035	0.308564414	United States
40919	9	0	NA	NA	NA	1	0.75	NA	NA	United States
40920	9	8	1	1	0.692307692	0	0.857142857	3.634	0.560384923	United States
40920	9	4	1	1	0.636363636	0	0.857142857	4.268	0.630224411	United States
40920	9	2	1	0	0.857142857	0	0.857142857	5.652	0.752202153	United States
40920	9	6	1	1	0.785714286	0	0.857142857	4.484	0.651665604	United States
40920	9	3	1	1	0.8	0	0.857142857	9.06	0.957128198	United States
40920	9	5	1	1	0.833333333	0	0.857142857	4.374	0.640878779	United States
40920	9	9	1	1	0.461538462	0	0.857142857	5.738	0.758760544	United States
40920	9	0	NA	NA	NA	0	0.857142857	NA	NA	United States
40920	9	1	0	NA	NA	0	0.857142857	8.096	0.908270499	United States
40920	9	7	1	1	0.916666667	0	0.857142857	3.629	0.559786968	United States
40920	9	10	0	1	0.307692308	0	0.857142857	4.435	0.646893624	United States
41000	10	7	0	1	0.8	1	0.6	1.904	0.279666944	United States
41000	10	9	1	1	1	1	0.6	1.659	0.219846386	United States
41000	10	1	1	NA	NA	1	0.6	3.369	0.527501011	United States
41000	10	4	0	1	0.75	1	0.6	1.969	0.294245716	United States
41000	10	3	1	1	0.916666667	1	0.6	1.197	0.07809415	United States
41000	10	6	1	0	0.9	1	0.6	1.592	0.201943063	United States
41000	10	5	0	0	0.75	1	0.6	1.646	0.216429831	United States
41000	10	8	1	0	0.888888889	1	0.6	1.59	0.201397124	United States
41000	10	2	1	1	0.6	1	0.6	2.123	0.326949994	United States
41000	10	10	1	1	1	1	0.6	2.476	0.39375064	United States
41000	10	0	NA	NA	NA	1	0.6	NA	NA	United States
41001	10	8	1	1	0.666666667	1	0.857142857	2.895	0.461648568	United States
41001	10	6	1	1	0.785714286	1	0.857142857	3.073	0.48756256	United States
41001	10	10	1	1	0.846153846	1	0.857142857	2.794	0.446226402	United States
41001	10	4	1	1	0.818181818	1	0.857142857	4.335	0.636989102	United States
41001	10	7	1	1	0.846153846	1	0.857142857	3.123	0.494571984	United States
41001	10	5	1	1	0.727272727	1	0.857142857	5.167	0.713238462	United States
41001	10	0	NA	NA	NA	1	0.857142857	NA	NA	United States
41001	10	3	1	1	1	1	0.857142857	4.641	0.666611568	United States
41001	10	1	1	NA	NA	1	0.857142857	6.894	0.838471279	United States
41001	10	9	1	1	0.692307692	1	0.857142857	9.14	0.960946196	United States
41001	10	2	1	1	0.857142857	1	0.857142857	5.216	0.717337583	United States
41002	10	0	NA	NA	NA	0	0.5	NA	NA	United States
41002	10	3	0	0	0.6	0	0.5	2.452	0.389520466	United States
41002	10	1	0	NA	NA	0	0.5	13.851	1.141481129	United States
41002	10	4	0	0	0.8	0	0.5	3.64	0.561101384	United States
41002	10	2	0	0	0.5	0	0.5	11.112	1.045792233	United States
41002	10	6	0	0	0.666666667	0	0.5	5.091	0.706803097	United States
41002	10	5	0	0	0.2	0	0.5	4.241	0.627468272	United States
41003	10	2	1	0	0.8	0	0.8	11.326	1.054076557	India
41003	10	8	0	0	1	0	0.8	3.241	0.510679031	India
41003	10	6	0	0	1	0	0.8	4.417	0.645127399	India
41003	10	0	NA	NA	NA	0	0.8	NA	NA	India
41003	10	3	0	1	1	0	0.8	7.725	0.887898488	India
41003	10	10	1	0	0.5	0	0.8	6.524	0.814513952	India
41003	10	4	0	0	1	0	0.8	4.043	0.606703741	India
41003	10	1	0	NA	NA	0	0.8	5.076	0.705521613	India
41003	10	9	0	0	0.666666667	0	0.8	2.944	0.468937806	India
41003	10	7	0	0	1	0	0.8	5.036	0.702085721	India
41003	10	5	0	0	0.8	0	0.8	4.971	0.696443763	India
41004	10	10	0	1	0.909090909	1	0.6	2.328	0.366982976	United States
41004	10	4	0	1	0.818181818	1	0.6	1.956	0.29136885	United States
41004	10	1	1	NA	NA	1	0.6	2.58	0.411619706	United States
41004	10	9	1	1	0.8	1	0.6	1.954	0.290924559	United States
41004	10	6	1	1	0.8	1	0.6	1.82	0.260071388	United States
41004	10	5	1	0	0.7	1	0.6	2.573	0.410439786	United States
41004	10	3	1	1	0.777777778	1	0.6	0.821	-0.085656843	United States
41004	10	2	1	1	0.6	1	0.6	2.013	0.303843775	United States
41004	10	0	NA	NA	NA	1	0.6	NA	NA	United States
41004	10	8	1	0	0.875	1	0.6	1.594	0.202488317	United States
41004	10	7	0	1	0.833333333	1	0.6	2.075	0.317018101	United States
41005	10	4	1	1	1	1	1	3.186	0.503245771	United Kingdom
41005	10	7	1	1	1	1	1	2.687	0.429267666	United Kingdom
41005	10	9	1	1	0.9	1	1	4.662	0.668572269	United Kingdom
41005	10	1	1	NA	NA	1	1	2.226	0.34752516	United Kingdom
41005	10	0	NA	NA	NA	1	1	NA	NA	United Kingdom
[truncated: 13,259 more rows]
