# Supplementary material for: Cooperation, decision time, and culture: Online experiments with American and Indian participants
Source: PLoS One. 2017 Feb 23;12(2):e0171252. doi: 10.1371/journal.pone.0171252 (PMC5322955; doi:10.1371/journal.pone.0171252)
Supplement: S2 File — (DO) [file pone.0171252.s002.do]

*******************************************************************************
*Codes for "Cooperation, decision time, and culture"
*Written by Akihiro Nishi (akihironishi@ucla.edu
*Last update: Jan 15, 2017

*******************************************************************************
*Step 0: Data infile
clear
insheet using "/xxxx/CULT_data.csv"
describe

*playerid: Player's ID 
*game: Game ID
*round: Round number
*coop: Cooperation at the present round (1: cooperation)
*prev_coop: Cooperation at the prior round (1: cooperation)
*prev_local_rate_coop: Cooperation rate of connecting neighbors at the prior round
*int_coop: Cooperartion at the first round (1: cooperation)
*time: Response time
*ltime: Log10 response time
*country_name: Country name

destring time, replace force 
destring ltime, replace force 
destring coop, replace force
keep if coop==1 | coop==0
*N=13560
destring prev_local_rate_coop, replace force
destring prev_coop, replace force
destring int_coop, replace force

gen country = .
replace country=0 if country_name == "United States"
replace country=1 if country_name == "India"
keep if country != .

tab country, missing

sum time, detail
*ALL: median: 3.85 seconds, IQR: 2.63 - 6.66 (N = 12,934)

sum time if country==0, detail
*US: median: 3.77 seconds, IQR: 2.58 - 6.61 (N = 9936)

sum time if country==1, detail
*India: median: 4.07 seconds, IQR: 2.80 - 6.86 (N = 2998)

*Country difference
xi: mixed ltime country round if coop==1 || game: || playerid:, reml
xi: mixed ltime country round if coop==0 || game: || playerid:, reml
xi: mixed ltime i.coop*country round || game: || playerid:, reml
*After interacted by "cooperation", there is no effect of country (Cooperation is slower in the Indian)

sort round
by round: sum time if country==0
by round: sum time if country==1

*******************************************************************************
*Step I (Fig. 1, left): Round-1 analysis 
keep if round ==1

mixed ltime coop if country==0 || game:, reml
mixed ltime coop if country==1 || game:, reml
xi: mixed ltime i.coop*country || game:, reml
*interaction P < 0.001
 
*******************************************************************************
*Step II (Fig. 1, middle): Round-2C analysis
keep if round >=2 & prev_local_rate_coop >=0.50 & prev_local_rate_coop!=. 

mixed ltime coop round if country==0 || game: || playerid:, reml
mixed ltime coop round if country==1 || game: || playerid:, reml
xi: mixed ltime i.coop*country round || game: || playerid:, reml
*interaction P = 0.004

xi: mixed ltime i.coop*int_coop round if country==0 || game: || playerid:, reml
xi: mixed ltime i.coop*int_coop round if country==1 || game: || playerid:, reml
xi: mixed ltime i.coop*prev_coop round if country==0 || game: || playerid:, reml
xi: mixed ltime i.coop*prev_coop round if country==1 || game: || playerid:, reml

*******************************************************************************
*Step III (Fig. 1, right): Round-2D analysis
keep if round >=2 & prev_local_rate_coop <0.50 & prev_local_rate_coop!=. 

mixed ltime coop round if country==0 || game: || playerid:, reml
mixed ltime coop round if country==1 || game: || playerid:, reml
xi: mixed ltime i.coop*country round || game: || playerid:, reml
*interaction P = 0.042

xi: mixed ltime i.coop*int_coop round if country==0 || game: || playerid:, reml
xi: mixed ltime i.coop*int_coop round if country==1 || game: || playerid:, reml
xi: mixed ltime i.coop*prev_coop round if country==0 || game: || playerid:, reml
xi: mixed ltime i.coop*prev_coop round if country==1 || game: || playerid:, reml

*******************************************************************************
*Step IV for cooperation rate
sum coop if round==1 & country ==0
*75.2%
sum coop if round==1 & country ==1
*44.8%
sum coop if round >=2 & prev_local_rate_coop >=0.50 & prev_local_rate_coop!=. & country ==0 
*77.5%
sum coop if round >=2 & prev_local_rate_coop >=0.50 & prev_local_rate_coop!=. & country ==1 
*48.9%
sum coop if round >=2 & prev_local_rate_coop <0.50 & prev_local_rate_coop!=. & country ==0 
*22.7%
sum coop if round >=2 & prev_local_rate_coop <0.50 & prev_local_rate_coop!=. & country ==1 
*19.6%

melogit coop if round==1 & country==0 || game:
melogit coop if round==1 & country==1 || game:
melogit coop country if round==1 || game:
*P < 0.001

melogit coop if round >=2 & prev_local_rate_coop >=0.50 & prev_local_rate_coop!=. & country==0 || game: || playerid:
melogit coop if round >=2 & prev_local_rate_coop >=0.50 & prev_local_rate_coop!=. & country==1 || game: || playerid:
melogit coop country if round >=2 & prev_local_rate_coop >=0.50 & prev_local_rate_coop!=. || game: || playerid:
*P < 0.001

melogit coop if round >=2 & prev_local_rate_coop <0.50 & prev_local_rate_coop!=. & country==0 || game: || playerid:
melogit coop if round >=2 & prev_local_rate_coop <0.50 & prev_local_rate_coop!=. & country==1 || game: || playerid:
melogit coop country if round >=2 & prev_local_rate_coop <0.50 & prev_local_rate_coop!=. || game: || playerid:
*P = 0.151

*******************************************************************************
*Step V Additional analysis for the round trend

mixed ltime coop if country==0 & round==1 || game:, reml
mixed ltime coop if country==0 & prev_local_rate_coop >=0.50 & prev_local_rate_coop!=. & round==2 || game:, reml
mixed ltime coop if country==0 & prev_local_rate_coop >=0.50 & prev_local_rate_coop!=. & round==3 || game:, reml
mixed ltime coop if country==0 & prev_local_rate_coop >=0.50 & prev_local_rate_coop!=. & round==4 || game:, reml
mixed ltime coop if country==0 & prev_local_rate_coop >=0.50 & prev_local_rate_coop!=. & round==5 || game:, reml
mixed ltime coop if country==0 & prev_local_rate_coop >=0.50 & prev_local_rate_coop!=. & round==6 || game:, reml
mixed ltime coop if country==0 & prev_local_rate_coop >=0.50 & prev_local_rate_coop!=. & round==7 || game:, reml
mixed ltime coop if country==0 & prev_local_rate_coop >=0.50 & prev_local_rate_coop!=. & round==8 || game:, reml
mixed ltime coop if country==0 & prev_local_rate_coop >=0.50 & prev_local_rate_coop!=. & round==9 || game:, reml
mixed ltime coop if country==0 & prev_local_rate_coop >=0.50 & prev_local_rate_coop!=. & round==10 || game:, reml

mixed ltime coop if country==1 & round==1 || game:, reml
mixed ltime coop if country==1 & prev_local_rate_coop >=0.50 & prev_local_rate_coop!=. & round==2 || game:, reml
mixed ltime coop if country==1 & prev_local_rate_coop >=0.50 & prev_local_rate_coop!=. & round==3 || game:, reml
mixed ltime coop if country==1 & prev_local_rate_coop >=0.50 & prev_local_rate_coop!=. & round==4 || game:, reml
mixed ltime coop if country==1 & prev_local_rate_coop >=0.50 & prev_local_rate_coop!=. & round==5 || game:, reml
mixed ltime coop if country==1 & prev_local_rate_coop >=0.50 & prev_local_rate_coop!=. & round==6 || game:, reml
mixed ltime coop if country==1 & prev_local_rate_coop >=0.50 & prev_local_rate_coop!=. & round==7 || game:, reml
mixed ltime coop if country==1 & prev_local_rate_coop >=0.50 & prev_local_rate_coop!=. & round==8 || game:, reml
mixed ltime coop if country==1 & prev_local_rate_coop >=0.50 & prev_local_rate_coop!=. & round==9 || game:, reml
mixed ltime coop if country==1 & prev_local_rate_coop >=0.50 & prev_local_rate_coop!=. & round==10 || game:, reml

xi: mixed ltime i.coop*round if country==0 & prev_local_rate_coop >=0.50 & prev_local_rate_coop!=. & round>=2 || game:, reml
xi: mixed ltime i.coop*round if country==1 & prev_local_rate_coop >=0.50 & prev_local_rate_coop!=. & round>=2 || game:, reml

*******************************************************************************
*Step VI: Additional analysis (2nd round vs 3-10 rounds): Result did not change
*(Fig. 1, middle): Round-2C analysis
keep if round >=2 & prev_local_rate_coop >=0.50 & prev_local_rate_coop!=. 

mixed ltime coop round if country==0 || game: || playerid:, reml
mixed ltime coop i.round if country==0 || game: || playerid:, reml

mixed ltime coop round if country==1 || game: || playerid:, reml
mixed ltime coop i.round if country==1 || game: || playerid:, reml


xi: mixed ltime i.coop*country round || game: || playerid:, reml
*interaction P = 0.004
xi: mixed ltime i.coop*country i.round || game: || playerid:, reml

*(Fig. 1, right): Round-2D analysis
keep if round >=2 & prev_local_rate_coop <0.50 & prev_local_rate_coop!=. 

mixed ltime coop round if country==0 || game: || playerid:, reml
mixed ltime coop i.round if country==0 || game: || playerid:, reml

mixed ltime coop round if country==1 || game: || playerid:, reml
mixed ltime coop i.round if country==1 || game: || playerid:, reml

xi: mixed ltime i.coop*country round || game: || playerid:, reml
*interaction P = 0.042
xi: mixed ltime i.coop*country i.round || game: || playerid:, reml
